## Rapid active zone remodeling consolidates presynaptic potentiation

### Authors

Mathias A. Böhme<sup>1,2,3,9</sup>, Anthony W. McCarthy<sup>1,9</sup>, Andreas T. Grasskamp<sup>1,2</sup>, Christine B. Beuschel<sup>3</sup>, Pragya Goel<sup>4</sup>, Meida Jusyte<sup>1</sup>, Desiree Laber<sup>5</sup>, Sheng Huang<sup>3</sup>, Ulises Rey<sup>3,6</sup>, Astrid G. Petzold<sup>3</sup>, Martin Lehmann<sup>1</sup>, Fabian Göttfert<sup>7</sup>, Pejmun Haghighi<sup>8</sup>, Stefan W. Hell<sup>7</sup>, David Oswald<sup>5</sup>, Dion Dickman<sup>4</sup>, Stephan J. Sigrist<sup>2,3,10\*</sup> and Alexander M. Walter<sup>1,10\*</sup>

### Affiliations

<sup>1</sup> Leibniz-Forschungsinstitut für Molekulare Pharmakologie (FMP), 13125 Berlin, Germany.

<sup>2</sup> NeuroCure, Cluster of Excellence, Charité, 10117 Berlin, Germany.

<sup>3</sup> Institute for Biology/Genetics, Freie Universität Berlin, 14195 Berlin, Germany.

<sup>4</sup> Department of Neurobiology, University of Southern California, Los Angeles, CA 90089, USA.

<sup>5</sup> Institut für Neurophysiologie, Charité Universitätsmedizin, 10117 Berlin, Germany

<sup>6</sup> Department of Theory and Bio-systems, Max Planck Institute of Colloids and Interfaces, Science Park Golm, 14424 Potsdam, Germany.

<sup>7</sup> Department of Nanobiophotonics, Max Planck Institute for Biophysical Chemistry, 37077 Göttingen, Germany

<sup>8</sup> Buck Institute for Research on Aging, Novato, CA, United States of America.

<sup>9</sup> These authors contributed equally

<sup>10</sup> Equally contributing senior authors.

\*Correspondence to: Stephan J. Sigrist ([stephan.sigrist@fu-berlin.de](mailto:stephan.sigrist@fu-berlin.de)) or Alexander M. Walter ([awalter@fmp-berlin.de](mailto:awalter@fmp-berlin.de)).

1 **Abstract**

2 Synaptic transmission is mediated by neurotransmitter release at presynaptic active zones (AZs)  
3 followed by postsynaptic neurotransmitter detection. Plastic changes in transmission maintain  
4 functionality during perturbations and enable memory formation. Postsynaptic plasticity targets  
5 neurotransmitter receptors, but presynaptic plasticity mechanisms directly regulating the  
6 neurotransmitter release apparatus remain largely enigmatic. Here we describe that AZs consist  
7 of nano-modular release site units and identify a molecular sequence adding more modules  
8 within minutes of plasticity induction. This requires cognate transport machinery and a discrete  
9 subset of AZ scaffold proteins. Structural remodeling is not required for the immediate  
10 potentiation of neurotransmitter release, but rather necessary to sustain this potentiation over  
11 longer timescales. Finally, mutations in Unc13 that disrupt homeostatic plasticity at the  
12 neuromuscular junction also impair short-term memory when central neurons are targeted,  
13 suggesting that both forms of plasticity operate via Unc13. Together, while immediate synaptic  
14 potentiation capitalizes on available material, it triggers the coincident incorporation of modular  
15 release sites to consolidate stable synapse function.

## 16 **Introduction**

17 Neurotransmitter-laden synaptic vesicles (SVs) release their content at presynaptic active zones  
18 (AZs) in response to  $\text{Ca}^{2+}$  influx through voltage gated channels that respond to action-potential  
19 (AP) depolarization. Neurotransmitter binding to postsynaptic receptors subsequently leads to  
20 their activation for synaptic transmission. Modulation of transmission strength is called synaptic  
21 plasticity. Long-term forms of synaptic plasticity are major cellular substrates for learning,  
22 memory, and behavioral adaptation<sup>1, 2</sup>. Mechanisms of long-term synaptic plasticity modify the  
23 structure and function of the presynaptic terminal and/or the postsynaptic apparatus. AZs are  
24 covered by complex scaffolds composed of a conserved set of extended structural proteins.  
25 ELKS/Bruchpilot (BRP), RIM, and RIM-binding protein (RBP) functionally organize the  
26 coupling between  $\text{Ca}^{2+}$ -channels and release machinery by immobilizing the critical (M)Unc13  
27 release factors in clusters close to presynaptic  $\text{Ca}^{2+}$ -channels and thus generate SV release sites,  
28 at both mammalian and *Drosophila* synapses<sup>3-12</sup>. Whether and how discrete AZ release sites and  
29 the associated release machinery are reorganized during plastic changes remains unknown.

30 One crucial form of presynaptic plasticity is the homeostatic control of neurotransmitter  
31 release. This process, referred to as presynaptic homeostatic potentiation (PHP), is observed in  
32 organisms ranging from invertebrates to humans, but is perhaps best illustrated at the larval  
33 neuromuscular junction (NMJ) of *Drosophila melanogaster*<sup>13, 14</sup>. Here, PHP requires the core  
34 AZ-scaffolding proteins RIM, RBP and Fife<sup>15-17</sup> and physiologically coincides with the  
35 upregulation of SV release sites<sup>17, 18</sup>. Yet it is unknown how these AZ-scaffolds mediate release  
36 site addition, which downstream molecules are needed for PHP, whether AZ-scaffold  
37 independent reactions occur and whether these mechanisms extend to other forms of plasticity,  
38 e.g. during learning in the central nervous system.

39           Here, we combine genetic and electrophysiological analysis to reveal a molecular  
40 sequence that triggers structural remodeling of AZ scaffolding proteins (BRP/RBP) that  
41 ultimately lead to (M)Unc13 addition within minutes. Using super-resolution light microscopy  
42 we identify a modular AZ nano-architecture built by these proteins (which corresponds to SV  
43 release sites) that rapidly extends by incorporating additional modules for plasticity. This “rapid  
44 remodeling” critically depends on the core AZ scaffolding proteins RBP/BRP, but neither on the  
45 early AZ assembly factors Liprin- $\alpha$ /Syd-1, nor on RIM or Fife. Additionally, AZ-remodeling  
46 was abolished in transport mutants previously shown to promote BRP/RBP transport. Strikingly,  
47 rapid addition of AZ nano-clusters was not required for the immediate expression of PHP on a  
48 minutes’ timescale, but was essential to sustain potentiation thereafter. We identify Unc13A as a  
49 direct molecular target for PHP in experiments in which Unc13A was delocalized from the AZ  
50 scaffolds. This mutant displayed sizable synaptic transmission but fully lacked PHP and AZ-  
51 remodeling. The same interference in mushroom body Kenyon cells of the *Drosophila* brain  
52 eliminated short-term memory, indicating that Unc13A is also a plasticity target in the central  
53 nervous system. In summary, we show that synapses capitalize on the available AZ material for  
54 immediate potentiation, but coincidentally undergo release site addition via modular building  
55 blocks to consolidate stable synaptic potentiation. Thus, our work lays a foundation from which  
56 to mechanistically understand a likely conserved presynaptic plasticity process important for  
57 dynamically adjusting and stabilizing neurotransmission across multiple timescales.

## 58 **Results**

### 59 **Rapid and chronic homeostatic plasticity regulate AZ protein levels**

60 As a robust paradigm for assessing presynaptic plasticity over different time scales, we focused  
61 on PHP, which is well characterized at *Drosophila* NMJs<sup>13</sup>. To induce plasticity on a timescale  
62 of minutes, postsynaptic ionotropic glutamate receptors were partially blocked using the non-  
63 competitive open-channel blocker Philanthotoxin-433 (PhTx)<sup>19</sup> (Fig. 1a-d). This reduces  
64 postsynaptic sensitivity to neurotransmitter release from single SVs (reflected in a reduction of  
65 the amplitude of spontaneously occurring “minis”, single SV fusion events, Fig. 1b). Initially,  
66 this also leads to a proportional decrease in AP-evoked transmission, but in less than 10 minutes,  
67 PHP increases the number of SVs released per AP (quantal content) to compensate for the  
68 postsynaptic interference, resulting in AP-evoked transmission comparable to baseline levels  
69 (Fig. 1b)<sup>19</sup>. To identify molecular adaptations during plasticity, we investigated whether the  
70 levels of any of the evolutionarily conserved AZ proteins were altered. We thus immunostained  
71 against BRP, RBP, Unc13A (we focused on Unc13A, the Unc13 isoform dominating evoked SV  
72 release at *Drosophila* NMJ synapses<sup>7</sup>; flybase: unc-13-RA), Syx-1A, Unc18 and Syd-1 (as  
73 motoneuronally expressed Syd-1-GFP) (Fig. 1c; Supplementary Fig. 1a). In agreement with  
74 previous observations<sup>18, 20</sup>, we found that 10 minutes of PhTx treatment increased AZ BRP-  
75 levels by about 50% (Fig. 1c,d). In addition, we found that RBP, Unc13A and Syx-1A increased  
76 by about 30%, 60%, and 65%, respectively (Fig. 1c,d). The AZ levels of RBP/BRP,  
77 Unc13A/BRP and Syx-1A/BRP scaled proportionally over all AZ sizes (Supplementary Fig. 1b;  
78 Ctrl, black lines). This proportionality was preserved upon PhTx treatment (Supplementary Fig.  
79 1b; PhTx, blue lines). Notably, the AZ-levels and distribution of the essential Sec1/(M)Unc18  
80 family protein Unc18 – which was recently found to function in PHP<sup>21</sup> – were unaffected (Fig.

81 1c,d;), demonstrating specific up-regulation of a subset of AZ proteins. Another AZ protein, the  
82 assembly factor Syd-1 even displayed a slight reduction upon PhTx (Supplementary Fig. 1a),  
83 further underscoring a high degree of specificity.

84 To verify that these AZ-adaptations were specific to functional glutamate receptor  
85 interference, and to address their relevance over a longer time window, we investigated larvae  
86 bearing mutations in a glutamate receptor subunit (Fig. 1e-h). Deletion of the high-conductance  
87 receptor subunit IIA (GluRIIA) results in a similarly reduced postsynaptic sensitivity to single  
88 SV fusion events (Fig. 1f) as PhTx treatment (Fig. 1b). Because under these circumstances PHP  
89 also increases quantal content to achieve similar AP-evoked transmission (Fig. 1f), *gluRIIA*  
90 mutants have extensively been used to investigate long-term PHP (over the 3-4 days of larval  
91 development)<sup>22, 23</sup>. Immunostainings against BRP, RBP, Unc13A, and Syx-1A confirmed their  
92 (in this case larger) elevation on this longer timescale (compare Fig. 1g,h with 1c,d) (100%,  
93 70%, 400% and 200%, respectively, compared to 50%, 30%, 60% and 65% upon PhTx  
94 treatment). Unlike the stoichiometric increase observed for BRP/Unc13A within minutes, this  
95 long-term PHP revealed enhanced Unc13A AZ-incorporation (Supplementary Fig. 1c). Another  
96 distinction was a remarkable reorganization and 8-fold increase of Unc18 (Fig. 1g,h;  
97 Supplementary Fig. 1d,e). Our data thus imply that considerable AZ restructuring occurs within  
98 minutes of PHP induction, which is further enhanced across longer-lasting timescales.

99

#### 100 **Rapid addition of Unc13A/BRP/RBP release site modules during homeostatic plasticity**

101 We next sought to investigate how the altered levels of AZ proteins during PHP affected their  
102 nanoscopic topology by super-resolution STED microscopy (x-y resolution ~ 30-40 nm). As  
103 noted before, planar AZs revealed clearly distinguishable individual Unc13A/BRP/RBP spots

104 arranged in a ring-like geometry<sup>3, 7-9</sup> (Fig. 2a). It was recently shown by single molecule  
105 imaging, these individual clusters likely contain several (probably few tens of) molecules in the  
106 case of BRP<sup>24</sup>. We detected the number of clusters per AZ in single AZ-images with a simple  
107 peak detection algorithm which was largely heterogeneous for all three proteins (Fig. 2c-e (black  
108 bars)). However, in all cases the cluster number per AZ increased upon PhTx-treatment (Fig. 2c-  
109 e (blue bars)), and slightly increased further in *gluRIIA*<sup>Null</sup> mutants (Supplementary Fig. 2a;  
110 brown bars). With increasing AZ-cluster number the AZ diameter (measured from the AZ center  
111 to the center of the clusters) also increased in both conditions (Supplementary Fig. 2b,c),  
112 consistent with previous STED analysis performed on BRP-rings<sup>18</sup>. Notably, the observed  
113 remodeling only affected cluster numbers, and did not alter their intensities (Supplementary Fig.  
114 2b,c). Thus, the first conclusion of our analysis is that PHP increases the number  
115 Unc13A/BRP/RBP nano-clusters per AZ within minutes.

116 We also wanted to investigate whether the overall AZ-topology changed upon cluster  
117 incorporation. Notably, averaging of STED-images was recently used to generate a three-  
118 dimensional model of an "average" synapse, displaying the mean protein localization at high  
119 resolution<sup>25</sup>. Thus, to compare the overall single AZ-topology, AZ images were centered, sorted  
120 by the number of clusters, aligned by rotation, and averaged. Two different alignment methods  
121 were used. In the first procedure, images were simply rotated such that the cluster with the  
122 highest intensity was positioned to the top (Supplementary Fig. 3a and Methods for details).  
123 Even though this procedure only targeted a single pixel per image (the position of the brightest  
124 cluster), the remaining (lower intensity) clusters were often found in similar relative positions,  
125 such that averaging revealed a simple polygonal geometrical series (Supplementary Fig. 3a),  
126 demonstrating some regularity. In a more refined analysis, we simultaneously considered the

127 position of all clusters per AZ (Supplementary Fig. 3c and Methods for details) which also  
128 revealed a simple geometrical pattern for Unc13A, BRP and RBP (Fig. 2f-h and Supplementary  
129 Fig. 3c). This stereotypical arrangement was best seen for AZs containing 2-6 clusters but less  
130 clear for AZs containing more than that (which could mean that these are less regular;  
131 Supplementary Fig. 2d,e). This arrangement was unaltered upon PhTx-treatment or *gluRIIA*  
132 ablation (Figure 2f-h and Supplementary Fig. 4a-c). Notably, the results of these averaging  
133 approaches obviously produced specific patterns, as neither random categorization of the single  
134 AZ images nor applying this methodology to Syx-1A and Unc18 (which are diffusely distributed  
135 at the AZ) resulted in regular but instead in highly irregular/random fluorescence patterns  
136 (Supplementary Figs. 3b and 2f,g). This also demonstrates that structural features are only  
137 conserved across AZs containing the same number of clusters. It should be noted that only the  
138 average images (Fig. 2f-h; Supplementary Fig. 4) depend on this procedure, while detecting the  
139 effects of PhTx or *gluRIIA* ablation on cluster numbers (Fig. 2c-h) was fully independent of this.

140 Thus, these findings imply that complexes of the core AZ-scaffold form discrete nano-  
141 modular structures, which correspond to SV release sites, and that rapid presynaptic plasticity  
142 triggers their fast AZ-incorporation which is even further enhanced over longer-timescales.

143

#### 144 **Mutations that impair BRP/RBP transport disrupt rapid AZ-remodeling**

145 The remarkable remodeling of AZ material within the short timeframe of PhTx-treatment  
146 (minutes) raised the question of how this is mechanistically achieved. We first considered  
147 whether local presynaptic protein translation could be required<sup>26</sup>. However, treatment of larvae  
148 with 50 µg/ml of the translation blocker cycloheximide (prior and during PhTx-treatment) did  
149 not disrupt structural remodeling of BRP or vGlut (vesicular glutamate transporter) at AZs



150 (Supplementary Fig. 5a), consistent with re-modeling being translation-independent. Moreover,  
151 the functional increase in quantal content remained expressed in the presence of the blocker  
152 (Supplementary Fig. 5b), consistent with previous reports<sup>19,20</sup>.

153 Because active kinesin-dependent protein transport is required for long-term homeostatic  
154 plasticity in *gluRIIA*<sup>Null</sup> mutants<sup>27</sup>, we asked whether BRP/RBP transport mechanisms might be  
155 employed for AZ remodeling. For this we investigated proteins involved in BRP/RBP transport  
156 by their mutation which causes abnormal BRP/RBP accumulation in the moto-neuronal axons,  
157 such as Atg1 (Unc-51)<sup>28</sup>, serine–arginine (SR) protein kinase at location 79D (SrpK79D,<sup>29,30</sup>),  
158 and App-like interacting protein (Aplip-1, Jip1 or JNK interacting protein in mammals), a  
159 selective RBP transport-adaptor<sup>31</sup> (Fig. 3a,b). While we observed clear PhTx-induced BRP-  
160 /Unc13A-upscaling in Wild-type controls as well as in *atg1* mutants (Fig. 3a,b), remodeling was  
161 fully absent upon null-mutation of *srpk79D*, *aplip-1*<sup>32</sup> or in animals bearing an Aplip-1 point  
162 mutation that selectively prevents kinesin light chain interaction (*aplip-1<sup>ek4</sup>*)<sup>33</sup> (Fig. 3a,b).  
163 Additionally, STED microscopy revealed that *aplip-1<sup>ek4</sup>* and *srpk79D<sup>ATC</sup>* mutants appeared to  
164 contain fewer BRP/Unc13A clusters per AZ on average than Wild-type (compare Fig. 2c,d with  
165 Fig. 3c) and fully lost the capacity to increase cluster numbers upon PhTx-treatment (even a  
166 decrease was observed, Fig. 3c). We also discovered that upon motoneuronal Aplip-1 or  
167 SrpK79D knock-down, Unc13A-GFP co-accumulated with aberrant axonal BRP aggregates  
168 (Supplementary Fig. 5c,d). Interestingly, a partial co-accumulation of BRP/Unc13A-GFP (but to  
169 a lower extent in comparison to the knock-downs) was also present in the control situation, in  
170 line with an at least partial co-transport that we occasionally observed in live-imaging  
171 experiments (Supplementary Fig. 5c-g; Movie 1).

172 We further wanted to elaborate on the involvement of active protein transport during  
173 PhTx-induced AZ-remodeling by interfering with the cytoskeletal “tracks” used for short-range  
174 transport with Latrunculin B (an actin polymerization blocker). While the AZ levels of  
175 BRP/Unc13A were already slightly enhanced by Latrunculin B treatment (Supplementary Fig.  
176 6a,b), PhTx-treatment failed to induce the typical increase of the AZ levels of these proteins (in  
177 fact a reduction was observed, Supplementary Fig. 6a,b). Thus, the actin cytoskeleton and active  
178 BRP/RBP transport are required for rapid AZ remodeling.

179

### 180 **Rapid homeostatic remodeling of AZ structure depends on BRP and RBP**

181 We next investigated which of the evolutionarily conserved core AZ scaffolding proteins are  
182 required for rapid AZ-remodeling. Loss of RBP fully blocked the rapid, PhTx-induced increase  
183 of BRP/Unc13A (Fig. 4a,b). Also BRP was essential, because the typical increase in Syx-1A and  
184 Unc13A observed upon PhTx treatment was abolished (Compare Fig. 4a,b with Fig. 1c,d).  
185 Notably, BRP-amounts appear to be rate-limiting because PhTx-induced AZ-remodeling was  
186 blocked in larvae heterozygous for a *brp* null allele (*brp*<sup>Null/+</sup>)(Fig. 4a,b). In contrast, null  
187 mutation of RIM, which abolished PHP<sup>17</sup>, did not interfere with AZ-remodeling (Fig. 4a,b).  
188 Furthermore, the simultaneous deletion of RIM and Fife (a possible RIM homologue which is  
189 required for PHP<sup>15, 34</sup>) did not interfere with AZ-remodeling. Thus, RIM and Fife appear to act  
190 downstream of BRP/RBP and are non-essential for AZ-remodeling (Fig. 4a,b).

191 AZ assembly is initiated by the conserved scaffolding proteins Liprin- $\alpha$  and Syd-1, which  
192 both regulate AZ size<sup>35-41</sup>. We reasoned that AZ growth –as observed here during plasticity– may  
193 capitalize on the same molecular machinery as *de novo* AZ formation, and therefore tested  
194 whether BRP/Unc13A-scaling depended on those proteins. However, *liprin- $\alpha$* <sup>Null</sup> and *syd-1*<sup>Null</sup>

195 mutants revealed normal PhTx-induced BRP/Unc13A-scaling (Fig. 4a,b), indicating that these  
196 factors are dispensable. Thus, systematic investigation of evolutionarily conserved AZ  
197 scaffolding proteins reveals a selective dependence on the core AZ-scaffolds BRP and RBP for  
198 structural remodeling during plasticity.

199

### 200 **AZ-remodeling is required for the chronic, but not rapid, functional expression of** 201 **homeostatic plasticity**

202 Several studies have shown that presynaptic release positively correlates with AZ-size<sup>3, 42-45</sup>.  
203 Therefore, we expected that the increase of AZ-BRP/Unc13A observed upon PhTx treatment  
204 would functionally increase presynaptic release (Fig. 1a-d). However, it is not entirely obvious  
205 whether the AZ-remodeling (which continues beyond the minutes' timescale during long-term  
206 PHP (Fig. 1e,g,h) would be essential for rapid PHP. For instance, loss of RBP was shown to  
207 occlude both AZ remodeling (Fig. 4) and the functional increase in quantal content<sup>16</sup>, suggesting  
208 a pivotal role in both adaptations. Yet PHP and AZ-remodeling do not go hand-in-hand in the  
209 case of RIM (and Fife) mutants, whose AZs remodel, but which cannot express PHP (increased  
210 quantal content<sup>15, 17</sup>). These observations prompted us to systematically investigate the relevance  
211 of AZ-remodeling for the rapid induction and sustained expression of PHP.

212 We first investigated the dependence of rapid PHP on the rapid remodeling of  
213 Unc13A/Syx-1A in *brp*<sup>Null</sup> larvae. Strikingly, AZ-remodeling was blocked (Fig. 4a,b), but  
214 functional PHP expression (an increased quantal content) persisted at levels comparable to the  
215 Wild-type/Control situation (Fig. 5a,b). In addition, mutants of *SrpK79D* (whose AZs also do not  
216 undergo PhTx-induced AZ-remodeling; Fig. 3a,b and replotted in Fig. 5d) were likewise able to  
217 increase their quantal content (Fig. 5c), showing that AZ remodeling can be uncoupled from

218 rapid PHP expression. Thus, even though AZ-remodeling occurs on a similar time-scale, it is not  
219 required to rapidly enhance the quantal content in these cases.

220 We next investigated whether elevation of the AZ protein levels was required to  
221 consolidate the increased quantal content over chronic time-scales in *gluRIIA*<sup>Null</sup> mutants (Fig.  
222 5e-h). Indeed, PHP was severely impaired in *brp*<sup>Null</sup>,*gluRIIA*<sup>Null</sup> double mutants (Fig. 5f). In an  
223 otherwise Wild-type background, the increase in quantal content (upon *gluRIIA*-null mutation)  
224 was much larger than when BRP was additionally deleted (Fig. 5f). We could ensure that the  
225 impairment was not due to the overall reduced release in *brp*<sup>Null</sup> mutants, as a loss to compensate  
226 for the *gluRIIA* ablation was also seen in *srpk79D*<sup>ATC</sup> mutants (which had comparable synaptic  
227 transmission to Wild-type cells (Fig. 5g), no AZ-remodeling upon PhTx-treatment (Fig 3a,b),  
228 intact PHP upon PhTx-treatment (Fig. 5c) and severely impaired PHP expression in *gluRIIA*<sup>Null</sup>  
229 (Fig. 5g)). Importantly, AZ-remodeling was also fully blocked in *gluRIIA*<sup>Null</sup>,*srpk79D*<sup>ATC</sup> double  
230 mutants (Fig. 5h). An intermediate behavior was seen in the case of the *aplip-1*<sup>ek4</sup> mutant,  
231 (Supplementary Fig. 7), possibly because other transport adapters might compensate in this  
232 situation. Together, this suggests that PHP rapidly increases neurotransmitter release through  
233 modulation of the available AZ components, but in addition immediately induces AZ-remodeling  
234 to ensure its consolidation.

235

### 236 **Presynaptic potentiation requires Unc13A**

237 We next sought to identify the molecular substrate of PHP. Previous experiments established a  
238 requirement of the  $\alpha 1$  voltage gated  $\text{Ca}^{2+}$ -channel subunit Cacophony (Cac)<sup>19, 46</sup>. In line with  
239 this, the levels of Cac as well as the  $\text{Ca}^{2+}$ -influx increase upon PhTx treatment (Fig. 6a,b)<sup>46-48</sup>.  
240 We furthermore investigated Unc13A. A slight PhTx-induced BRP-/RBP-scaling persisted upon

241 Unc13A loss, but was weaker than in the Wild-type situation (Fig. 6a,b), possibly due to slightly  
242 elevated BRP/RBP-AZ-levels already in the non-PhTx-treated *unc13A*<sup>Null</sup> situation<sup>7</sup>. Notably,  
243 Cac-levels were still increased, even to a slightly larger extent than in the Wild-type situation  
244 (Fig. 6a,b). However, functional PHP, the increase in quantal content, was completely lost  
245 (Fig. 6c,d). This indicates that Unc13A –like RIM and RBP<sup>16, 17</sup>– plays an essential role in the  
246 plastic enhancement of NT release during PHP.

247

### 248 **The Unc13A N-terminus is critical for rapid PHP, AZ-remodeling, and learning**

249 The observation that Unc13A is essential for PHP is fully consistent with the previous findings  
250 that RIM and RBP are required (<sup>16, 17</sup>, because these proteins likely function in Unc13A AZ  
251 recruitment and activation (see discussion). As in other species (*M. musculus/C. elegans*), this  
252 interaction depends on the (M)Unc13 N-terminus<sup>7, 49-53</sup>. To investigate the functional relevance  
253 of the Unc13A N-terminus for rapid PHP and AZ-remodeling, we used an Unc13A mutant  
254 lacking the N-terminal AZ-localization sequence (named C-term-GFP; Fig. 6e), which uncouples  
255 Unc13A from the central BRP/RBP scaffold<sup>3</sup> (and therefore supposedly also uncouples SV  
256 fusion from a possible regulatory function of RIM –see discussion). Importantly, the magnitude  
257 of AP-evoked synaptic transmission in these mutants was largely restored compared to the  
258 detrimental effect of *unc13*<sup>Null</sup> mutation (compare Fig. 6h (C-term-GFP; grey traces) with Fig. 6h  
259 (full-length Unc13A-GFP; black traces) and <sup>3</sup>). However, in contrast to control larvae (*Unc13*<sup>Null</sup>  
260 with full-length Unc13A-GFP rescue; Fig. 6f-i), C-term-GFP mutants (*Unc13*<sup>Null</sup> with C-term-  
261 GFP rescue; Fig. 6f-i) completely lacked AZ-remodeling (Fig. 6f,g) (note that BRP levels were  
262 already enhanced in the non-PhTx-treated group, Supplementary Fig. 8a,b), Furthermore, unlike  
263 in control larvae, no rescue of evoked transmission and no increase in quantal content was seen

264 upon PhTx treatment, indicating that C-term mutants were deficient of functional PHP (Fig. 6h-  
265 i). This demonstrates a dependence of PHP on the Unc13A N-terminus.

266 Although synapses vary tremendously in their excitability, input/output relationship, and  
267 transmitter type, the presynaptic release machinery is remarkably conserved in most systems and  
268 across species<sup>54</sup>. Thus, we wondered whether the principles of rapid presynaptic adaptation of  
269 the peripheral nervous system might be utilized in other synapse types and in other forms of  
270 plasticity, like the ones involved in learning and memory formation. Because short-term memory  
271 functions on timescales comparable to the PhTx-induced rapid homeostatic plasticity<sup>55</sup>, we  
272 investigated whether the Unc13 C-term mutant also exhibited learning deficits.

273 We specifically expressed C-term-GFP alone, or while simultaneously knocking down  
274 endogenous full-length Unc13A (Unc13A-RNAi), in mushroom body Kenyon cells (KCs). KC  
275 output synapses undergo learning-induced plasticity and are required for the formation of short-  
276 term memories<sup>56</sup>. Knockdown of endogenous Unc13A and expression of C-term-GFP were  
277 confirmed using antibodies against GFP (labelling C-term-GFP but not endogenous protein) and  
278 the Unc13A N-terminus (labelling the endogenous protein but not C-term-GFP where the N-  
279 terminal epitope is deleted) (Fig. 7a). Additionally, we confirmed the strong efficacy of the  
280 Unc13A-RNAi via Western blot (knock-down in the entire brain using the pan-neuronal elav-  
281 Gal4 driver; Supplementary Fig. 9a).

282 Because the C-term-GFP construct largely rescued the detrimental effect of *unc13* null  
283 mutation at the NMJ<sup>3</sup>, we predicted that general transmission from KCs should be functional for  
284 both the C-term-GFP and the C-term-GFP/Unc13A-RNAi conditions. To verify this, we  
285 performed *in vivo* two photon Ca<sup>2+</sup>-imaging (GCaMP6f) experiments in adult flies to assess  
286 odor-evoked responses at the M4/6 (MBON-β'2mp/MBON-γ5β'2a/MBON-β2β'2a) mushroom

287 body output neurons, a postsynaptic circuit element directly downstream of KCs<sup>57, 58</sup>. Indeed,  
288 robust Ca<sup>2+</sup> transients in response to odor stimulation were observed in all genetic constellations  
289 tested (Fig. 7b). We thus conclude that KC output synapses expressing C-term-GFP or C-term-  
290 GFP/Unc13A-RNAi are functional under naive conditions. Together with the finding that naive  
291 odor avoidance was not statistically different between all these groups (Supplementary Fig. 9b),  
292 this allowed us to test whether either condition would interfere with learning and memory.

293 We assessed short-term memory in adult *Drosophila* using classical aversive olfactory  
294 conditioning. Flies were trained by pairing an odor with an electric shock and learning was  
295 scored by subsequently assaying avoidance of that odor<sup>59</sup>. All control groups showed similarly  
296 robust memory performance, while the relevant C-term-GFP/Unc13A-RNAi mutant (where  
297 endogenous Unc13A is knocked down and replaced by the C-term mutant incapable of PHP  
298 (Fig. 6e-i)) showed severe short-term memory impairments (Fig. 7c). Whether these impairments  
299 are indeed a consequence of the loss of a similar plasticity mechanism as the one observed at the  
300 NMJ or whether they are also related to differences in the synaptic transmission profile (e.g.  
301 short-term plasticity which is also affected in this mutant<sup>3</sup>) remains to be established.  
302 Nevertheless, our data clearly indicate that Unc13A is a target for similar forms of plasticity  
303 (Unc13A-RNAi knockdown also impaired short-term memory, Supplementary Fig. 9b,c). Thus,  
304 our data imply that structural, functional, and behavioral adaptations are linked, that different  
305 forms of presynaptic plasticity may converge on Unc13A, and that multiple forms may operate  
306 via conserved mechanisms.

307

## 308 **Discussion**

309 Synapses are able to modify their transmission strength by undergoing plastic changes. This  
310 synaptic plasticity is crucial for neuronal circuit adaptation including learning and memory  
311 processes<sup>60, 61</sup>. Molecular mechanisms for postsynaptic plasticity have been defined in  
312 considerable detail<sup>2</sup>. However, presynaptic mechanisms also modulate transmission strength in  
313 many synapse types and species<sup>13, 55, 62</sup>. Homeostatic plasticity is a well-studied form of  
314 presynaptic plasticity at the *Drosophila* NMJ where an enhancement of AP-evoked  
315 neurotransmitter release counterbalances decreased postsynaptic receptor sensitivity. A number  
316 of relevant signaling molecules and pathways, including BMP signaling, CaMKII signaling,  
317 TOR signaling, proteasomal degradation and trans-synaptic signaling are required for this<sup>13, 14, 63-</sup>  
318 <sup>65</sup>. These factors appear to converge on two principal avenues to enhance presynaptic transmitter  
319 release, via increased Ca<sup>2+</sup> channel amounts and AP-induced Ca<sup>2+</sup> influx<sup>46-48</sup> and secondly via an  
320 increase in the number of releasable SVs and their associated release sites<sup>17, 18, 48</sup>. However, some  
321 conditions were observed where Ca<sup>2+</sup> influx or Ca<sup>2+</sup>-channel levels were increased but the  
322 quantal content was not (Fig. 6a-d and <sup>17</sup>), suggesting that release site addition or activation is a  
323 required contributor. On the minutes' time-scale, structural AZ-remodeling was observed, yet  
324 whether and how this contributes to the enhancement of NT-release remained unclear<sup>18</sup>.

325 In the present study, we uncover a presynaptic sequence of molecular events that mediate  
326 AZ-remodeling (Fig. 8). We identify the presynaptic cytomatrix as a highly dynamic structure  
327 that can add discrete nano-modules of core proteins within minutes. In the initial phase of this  
328 structural remodeling, RBP and BRP are needed as their loss occludes an increase in Syx-1A-  
329 and Unc13A levels (Fig. 4). Somewhat unexpectedly, although AZ-remodeling occurs on the  
330 same minutes' time-scale, it is dispensable for the rapid potentiation of NT-release during PhTx-



331 induced PHP (e.g. *brp*<sup>Null</sup>, *aplip-1*<sup>ek4</sup> or *srpk79D*<sup>ATC</sup>)(Fig. 6). However, the remodeling is  
332 essential for the long-term consolidation of the potentiation (the capacity to restore the AP-  
333 evoked response in *gluRIIA*<sup>Null</sup> mutants was severely impaired when combined with *brp*<sup>Null</sup> or  
334 *srpk79D*<sup>ATC</sup>)(Fig. 6).

335 Thus, the rapid release enhancement appears to capitalize on AZ-material already present,  
336 for example by increasing Ca<sup>2+</sup> influx<sup>46</sup> and by the activation of already present but dormant  
337 release sites consistent with PHP depending on RIM, RBP and Unc13A (Muller, 2015  
338 #15;Muller, 2012 #16}; this study). Interestingly, the rapid potentiation coincides with the  
339 accumulation of BRP, Cac, RBP, Unc13A, Syx-1A and (later) Unc18 in the AZ, which is  
340 required to consolidate and possibly extend the release enhancement. Thus, the synapse utilizes  
341 two coincident programs which together ensure immediate rescue and also supply the synapse  
342 with backup-material in the form of BRP/RBP/Unc13A nano-modules in case the disturbance  
343 persists.

344 Notably, recent work using STED microscopy to characterize hippocampal synapses also  
345 identified AZ nano-modules by clusters of Bassoon, vGlut and Synaptophysin, and observed a  
346 scaling of vGlut and Synaptophysin upon chemically induced LTP<sup>66</sup>. This nicely aligns with the  
347 structural AZ-remodeling described here, suggesting an evolutionarily conserved process, tuning  
348 synaptic transmission by adding nano-modular structures to both sides of the synapse.  
349 Additionally, activity dependent alterations in Syx-1A nano-clusters were also recently  
350 described<sup>67</sup>, further pointing to the AZ being a highly dynamic structure which adapts to  
351 different environmental demands.

352 How does the AZ scaffold remodel within minutes? While local protein translation is  
353 required for some forms of plasticity<sup>68</sup>, acute translation block did not interfere with PhTx

354 induced AZ-remodeling (Supplementary Fig. 5a). However, we found evidence that effective AZ  
355 protein transport and a functional cytoskeleton is a precondition here: The BRP/RBP transport  
356 adaptor/regulator proteins Aplip-1 and Srpk79D were required for rapid enhancement of  
357 BRP/RBP AZ levels (and loss of Aplip-1-mediated BRP/RBP transport impaired short-term  
358 memory (Supplementary Fig. 9c)). Moreover, acute actin-depolymerization prevented the PhTx-  
359 induced BRP/Unc13A addition into AZs, further supporting a crucial role for their transport and  
360 in line with a recent study where *Drosophila* Mical, a highly conserved, multi-domain  
361 cytoplasmic protein that mediates actin depolymerization, was shown to be necessary for PHP<sup>63</sup>.

362         Considering the short timeframe of this adaptation, long-range transport appears unlikely.  
363 Instead, we favor the idea that Aplip-1 and Srpk79D function to engage an AZ-proximal reserve  
364 pool of components for rapid integration. This pool could originate from a local reservoir in the  
365 distal axon or terminal, or even between AZs, from which plasticity may trigger integration into  
366 established AZs<sup>18</sup>. Transport processes may fill or empty the reservoir. Between AZs, the  
367 reservoir could be composed of diffusely distributed proteins falling below the detection limit<sup>69</sup>,  
368 or could reflect a local rearrangement of material (note the reduction of AZs containing few AZ-  
369 protein modules after PhTx treatment (Fig. 2c-e) or upon *gluRIIA* ablation (Supplementary Fig.  
370 2a)). Reducing the amount of BRP (by removing one gene copy) blocked the rapid structural  
371 adaptation (Fig. 4a,b), possibly because all available material was required to build AZs of  
372 proper functionality leaving no material for the reservoir. Regardless of the specific molecular  
373 mechanism, guided active transport along the cellular cytoskeleton or rearrangements of the  
374 cytoskeleton itself appear to serve a general function in synaptic plasticity in multiple species<sup>63</sup>,  
375 <sup>70-72</sup>.

376 RIM and RBP are established targets for multiple forms of presynaptic plasticity in  
377 several synapse types and species<sup>5, 16, 17, 62, 73</sup>. Here we additionally identified a critical role for  
378 Unc13A (Fig. 6). In fact, with our data we can infer the inter-relation between these factors in  
379 presynaptic plasticity. RIM proteins are known to activate (M)Unc13s in several species<sup>49, 50, 53,</sup>  
380 <sup>74-76</sup>. While *C. elegans* and mouse (M)Unc13 proteins interact via an N-terminal C2A domain  
381 with RIM, no such domain is known for *Drosophila*, but the principal functional interaction may  
382 well be conserved (via another region of the N-term). This was directly tested by an Unc13A  
383 mutant, whose N-term was deleted<sup>3</sup>. This mutant largely rescued the severe loss of synaptic  
384 transmission in the *unc13*<sup>Null</sup> condition with comparable AP-evoked transmission as the full-  
385 length Unc13A rescue (Compare Fig. 6h black with grey traces). However, this mutant  
386 completely lacked the capacity to undergo PHP, consistent with a required RIM/RBP/Unc13A  
387 interplay for plasticity. Furthermore, expressing the same mutant in the *Drosophila* mushroom  
388 body memory center severely impaired short-term memory formation (Fig. 7), pointing to a  
389 relevance of the RIM/RBP/Unc13 plasticity module in the *Drosophila* central nervous system.

390 Thus, the morphological and molecular similarities between long-term sensitization in  
391 *Aplysia*, presynaptic LTP in the mammalian brain and homeostatic plasticity or learning in  
392 *Drosophila* indicate that the sequence of molecular events we describe here might be highly  
393 conserved.

394

395 **Online Methods**

396 **Experimental Model and Subject Details**

397 **Fly husbandry, stocks and handling**

398 Fly strains were reared under standard laboratory conditions<sup>77</sup> and raised at 25°C on semi-  
399 defined medium (Bloomington recipe). For RNAi experiments flies and larvae were kept at  
400 29°C. For experiments both male and female 3<sup>rd</sup> instar larvae or flies were used. The following  
401 genotypes were used: Wild type: +/+ (*w<sup>1118</sup>*). *gluRIIA*<sup>Null</sup>: *df(2L)cl<sup>h4</sup>/df(2L)gluRIIA&IIB<sup>SP22</sup>*  
402 (*A22*); *GluRIIB-GFP/+* or *AD9/df(2L)cl<sup>h4</sup>* or *gluRIIA<sup>SP16</sup>/gluRIIA<sup>SP16</sup>*. Supplementary Fig. 1a:  
403 *Ok6::Syd-1-GFP: Ok6-Gal4/+;UAS-Syd-1-GFP/+*. Transport mutants: Fig. 3,5; Supplementary  
404 Fig. 7: *aplip-1*<sup>Null</sup>: *aplip-1<sup>ex213</sup>/Df(3L)BSC799*; *aplip-1<sup>ek4</sup>: ap lip-1<sup>ek4</sup>/Df(3L)BSC799*; *atg-1:*  
405 *atg1<sup>ey07351</sup>/Df(3L)BSC10*; *srpk79D<sup>ATC</sup>: srpk79D<sup>atc</sup>/srpk79D<sup>atc</sup>*. Supplementary Fig. 5c: Ctrl: *Ok6-*  
406 *Gal4/+;UAS-Unc13A-GFP/+*; *aplip-1-RNAi: Ok6-Gal4/+;UAS-Unc13A-GFP/UAS-Aplip-1-*  
407 *RNAi*; Supplementary Fig. 5d; Ctrl: *Ok6-Gal4/+;UAS-Unc13A-GFP/+*; *srpk79D-RNAi: Ok6-*  
408 *Gal4/+;UAS-Unc13A-GFP/UAS-srpk79D-RNAi*. Intravital imaging: Movie 1 and Supplementary  
409 Fig. 5e-g: *Ok6/+;UAS-Unc13A-GFP/UAS-BRP-D3-Straw*. Fig. 4,5: *rbp*<sup>Null</sup>: *rbp<sup>Stop1</sup>/rbp<sup>S2.01</sup>*;  
410 *brp*<sup>Null</sup>: *brp<sup>A6.1</sup>/brp<sup>69</sup>*; *brp*<sup>Null/+</sup>: *brp<sup>69</sup>/+*; *rim*<sup>Null</sup>: *rim<sup>ex1.103</sup>/Df(3R)ED5785*; *rim*<sup>Null</sup> *fife*<sup>Null</sup>:  
411 *rim<sup>ex1.103</sup> fife<sup>ex1027</sup>/rim<sup>ex1.103</sup> fife<sup>ex1027</sup>*; *liprin-α*<sup>Null</sup>: *liprin-α<sup>F3ex15</sup>/liprin-α<sup>R60</sup>*; *syd-1*<sup>Null</sup>: *syd-1<sup>1.2</sup>/syd-*  
412 *1<sup>3.4</sup>*. Fig. 5: *gluRIIA*<sup>Null</sup>, *brp*<sup>Null</sup>: *gluRIIA<sup>SP16</sup>,brp<sup>6.1</sup>/gluRIIA<sup>SP16</sup>,brp<sup>69</sup>*; *gluRIIA*<sup>Null</sup>, *srpk79D*<sup>ATC</sup>:  
413 *AD9/df(2L)cl<sup>h4</sup>; srpk79D<sup>ATC</sup> /srpk79D<sup>ATC</sup>*. Supplementary Fig. 7: *gluRIIA*<sup>Null</sup>, *aplip-1<sup>ek4</sup>:*  
414 *AD9/df(2L)cl<sup>h4</sup>;aplip-1<sup>ek4</sup>/Df(3L)BSC799*. Fig. 6; Supplementary Fig. 8: *unc13A*<sup>Null</sup>:  
415 *EMS7.5/P84200*; For *UAS-Cac-GFP* in *unc13A*<sup>Null</sup>: Ctrl: *Ok6-Gal4, UAS-Cac-GFP/+*;  
416 *unc13A*<sup>Null</sup>: *Ok6-Gal4, UAS-Cac-GFP/+;;EMS7.5/P84200*; *Unc13A-GFP: elav-GAL4/+;;UAS-*  
417 *Unc13A-GFP/+;P84200/P84200*; C-term-GFP: *elav-GAL4/+;;UAS-C-term-*

418 *GFP/+;P84200/P84200*. Learning and memory: Fig. 7; Supplementary figure 9: *Ok107::+*;  
419 *Ok107-Gal4/+; Ok107::Aplip-1<sup>RNAi</sup>: UAS-Aplip-1-RNAi/+;Ok107-Gal4/+; MB247::+; MB247-*  
420 *Gal4/+; MB247::Aplip-1-RNAi: MB247-Gal4/UAS-Aplip-1-RNAi; UAS-Unc13A<sup>RNAi</sup>::+; UAS-*  
421 *Unc13A-RNAi/+; Ok107::UAS-C-term-GFP: UAS-C-term-GFP/+; Ok107-Gal4/+;*  
422 *OK107::UAS-C-term-GFP::Unc13A<sup>RNAi</sup>: UAS-C-term-GFP/UAS-Unc13A-RNAi; Ok107-*  
423 *Gal4/+; Ok107::UAS-Unc13A<sup>RNAi</sup>: UAS-Unc13A-RNAi/+;Ok107-Gal4/+*. Fig. 7b: *Ok107::+*;  
424 *VT1211-LexA::LexAop-GCaMP6f/+;;Ok107-Gal4/+; Ok107::UAS-C-term-GFP: VT1211-*  
425 *LexA::LexAop-GCaMP6f/+;UAS-C-term-GFP/+;Ok107-Gal4/+; OK107::UAS-C-term-*  
426 *GFP::Unc13A<sup>RNAi</sup>: VT1211-LexA::LexAop-GCaMP6f/+; UAS-C-term-GFP/UAS-Unc13A-RNAi;*  
427 *Ok107-Gal4/+*. Western blot, Supplementary Fig. 9a: *elav::+; elav-Gal4/+; UAS-Unc13A-*  
428 *RNAi::+; UAS-Unc13A-RNAi/+; elav::UAS-Unc13A<sup>RNAi</sup>: elav-Gal4/+;;UAS-Unc13A-RNAi/+*.  
429 Stocks were obtained from: *A22<sup>23</sup>; AD9, df(2L)cl<sup>h4</sup>, glurIIA<sup>SP16 22</sup>; GluRIIB-GFP<sup>78</sup>; Ok6-GAL4*  
430 *<sup>79</sup>; rbp<sup>Stop1</sup>, rbp<sup>S2.01 9</sup>; rim<sup>ex1.103 17</sup>; fife<sup>ex1027 34</sup>; liprin- $\alpha$ <sup>F3ex15</sup>, liprin- $\alpha$ <sup>R60 39</sup>; UAS-Syd-1-GFP; syd-*  
431 *I<sup>1.2</sup>, syd-I<sup>3.4 41</sup>; brp<sup>46.1 38</sup>; brp<sup>69 8</sup>; EMS7.5, UAS-Unc13A-GFP<sup>7</sup>; UAS-BRP-D3-Straw<sup>78</sup>; UAS-*  
432 *Cac-GFP<sup>80</sup>; elav-Gal4<sup>81</sup>; UAS-Unc13A-RNAi, UAS-C-term-GFP<sup>3</sup>; aplip-I<sup>ex213 32</sup>; aplip-I<sup>ek4 33</sup>;*  
433 *srpk79D<sup>atc 29</sup>; Ok107-Gal4<sup>82</sup>; MB247-Gal4<sup>83</sup>*. *P84200* was provided by the *Drosophila Genetic*  
434 *Resource Center (DGRC)*. The *aplip-I<sup>ek4</sup>*, *Df(3L)BSC799; atgI<sup>ey07351</sup>; Df(3L)BSC10;*  
435 *Df(3R)ED5785* lines were provided by the *Bloomington Drosophila Stock Center*. *UAS-Aplip-1-*  
436 *RNAi* and *UAS-srpk79D-RNAi* from *VDRC*.

437

438

439

440

441 **Method Details**

442 **Immunostaining**

443 Larvae were dissected and stained as described previously<sup>41</sup>. The following primary antibodies  
444 were used: guinea-pig Unc13A (1:500;<sup>7</sup>); mouse Syx1A 8C3 (1:40; Developmental Studies  
445 Hybridoma Bank, University of Iowa, Iowa City, IA, USA; AB Registry ID: AB\_528484);  
446 mouse Unc18/Rop 4F8 (1:500; Developmental Studies Hybridoma Bank, University of Iowa,  
447 Iowa City, IA, USA; AB Registry ID: AB\_1157869; mouse GFP 3E6 (1:500, Thermo Fisher  
448 Scientific Inc., MA, USA, A-11120; AB Registry ID: AB\_221568), mouse Nc82 = anti-BRP<sup>C-</sup>  
449 <sup>term</sup> (1:100, Developmental Studies Hybridoma Bank, University of Iowa, Iowa City, IA, USA;  
450 AB Registry ID: AB\_2314865); rabbit BRP<sup>Last200</sup> (1:1000;<sup>84</sup>); rabbit RBP<sup>C-term</sup> (1:500;<sup>9</sup>); guinea-  
451 pig vGlut; (1:2000;<sup>85</sup>). Except for staining against RBP; Syx1A and Unc18, where larvae were  
452 fixed for 10 min with 4 % paraformaldehyde (PFA) in 0.1 mM phosphate buffered saline (PBS),  
453 all fixations were performed for 5 min with ice-cold methanol. The glutamate receptor blocker  
454 PhTx-433 (Sigma-Aldrich, MO, USA) was prepared as a 4 mM stock solution either in DMSO  
455 (final DMSO concentration, 0.5%) or dH<sub>2</sub>O. Rapid pharmacological homeostatic challenge was  
456 assessed by incubating semi-intact preparations in 20 μM PhTx diluted in HL3 (see below)  
457 containing 0 or 1.5 mM CaCl<sub>2</sub> for 10 min at room temperature<sup>19</sup>. Controls were treated in the  
458 same way but were incubated either in pure HL3 or HL3 containing 0.5% DMSO (in dependence  
459 of how PhTx stock solution was prepared) for 10 min. After incubation, the dissection was  
460 completed and the preparation was rinsed three times with fixative solution. During the  
461 dissection, extreme care was taken to avoid excessive stretching of body wall muscles, as this  
462 may significantly impair induction of homeostasis<sup>19</sup>.

463 For translation block experiments semi-intact preparations were pre-incubated in HL3 containing  
464 50µg/ml Cycloheximide (Chx; Sigma-Aldrich, MO, USA) dissolved in DMSO for 10 minutes, a  
465 concentration previously shown to block protein synthesis in *Drosophila*<sup>86</sup>. Rapid  
466 pharmacological homeostatic challenge was then assessed by incubating semi-intact preparations  
467 in 20 µM PhTx (or a similar volume of H<sub>2</sub>O in control experiments) diluted in HL3 (see below)  
468 containing 50µg/ml Chx for 10 min at room temperature. For actin-depolymerization  
469 experiments semi-intact preparations were pre-incubated in HL3 containing 15 µM Latrunculin  
470 B (Abcam, UK) in DMSO for 10 minutes. For control experiments larvae were incubated with a  
471 solution containing a similar volume of DMSO. Rapid pharmacological homeostatic challenge  
472 was then assessed by incubating semi-intact preparations in 20 µM PhTx (or a similar volume of  
473 H<sub>2</sub>O in control experiments) diluted in HL3 (see below) containing 15 µM Latrunculin B in  
474 DMSO (or DMSO alone in control experiments) for 10 min at room temperature. Afterwards,  
475 prepping and staining procedures were performed as described above/below. Control animals  
476 were always reared in parallel and treated identically in all experiments.

477 Secondary antibodies for standard immunostainings were used in the following  
478 concentrations: goat anti-HRP-Cy5 (1:250, Jackson ImmunoResearch, PA, USA); goat anti-  
479 HRP-647 (1:500, Jackson ImmunoResearch 123-605-021, PA, USA); goat anti-rabbit-Cy3  
480 (1:500, Jackson ImmunoResearch 111-165-144, PA, USA); goat anti-mouse-Cy3 (1:500,  
481 Jackson ImmunoResearch 115-165-146); goat anti-mouse or anti guinea pig Alexa-Fluor-488  
482 (1:500, Life Technologies A11001/A11073, CA, USA). Larvae were mounted in vectashield  
483 (Vector labs, CA, USA). Secondary antibodies for STED were used in the following  
484 concentrations: goat anti-mouse or rabbit Alexa594 (1:500, Thermo Fisher Scientific Inc.  
485 A11032/A11037, MA, USA); goat anti-mouse Atto590 (1:100); goat anti-rabbit Atto590 (1:100);

486 goat anti-guinea pig star635 (1:100); goat anti-rabbit star635 (1:100); goat anti-mouse or rabbit  
487 Atto647N (1:250; Active Motif; 15038/15048). Atto590 (ATTO-TEC AD 590-31) and star635  
488 (Abberior 1-0101002-1) coupled to respective IgGs (Dianova). For STED imaging larvae were  
489 mounted in Mowiol (Max-Planck Institute for Biophysical Chemistry, Group of Stefan Hell) or  
490 ProLong Gold (Life-Technologies, CA, USA) on high-precision glass coverslips.

491 Western blot analysis was done as previously described<sup>87</sup>. Briefly, adult flies were dissected  
492 in cold Ringer's solution and homogenized in Lysis buffer (1x PBS, 0.5%Triton, 2%SDS, 1x  
493 Protease inhibitor, 1x Sample buffer) followed by full-speed centrifugation at 18°C. One brain's  
494 supernatant for each group was subjected to SDS-PAGE and immunoblotted according to  
495 standard procedures. The following antibodies were used: guinea-pig Unc13A (1:2000;<sup>7</sup>) and  
496 mouse Tubulin (1:100000; Sigmal-Aldrich, MO, USA; Cat# T9026, AB Registry ID:  
497 AB\_477593). Antibodies obtained from the Developmental Studies Hybridoma Bank were  
498 created by the NICHD of the NIH and maintained at The University of Iowa, Department of  
499 Biology, Iowa City, IA 52242.

500

### 501 **Image Acquisition, Processing, and Analysis**

502 Confocal microscopy was performed with a Leica SP8 microscope (Leica Microsystems,  
503 Germany). Images of fixed and live samples were acquired at room temperature. Confocal  
504 imaging of NMJs was done using a z-step of 0.25  $\mu\text{m}$ . The following objective was used: 63 $\times$ 1.4  
505 NA oil immersion for NMJ confocal imaging. All confocal images were acquired using the LAS  
506 X software (Leica Microsystems, Germany). Images from fixed samples were taken from muscle  
507 4 of 3<sup>rd</sup> instar larval 1b NMJs (segments A2-A5) or nerve bundles (segments A1-A3). Images for  
508 figures were processed with ImageJ software to enhance brightness using the brightness/contrast



509 function. If necessary, images were smoothed (0.5 pixel Sigma radius) using the Gaussian blur  
510 function. Confocal stacks were processed with ImageJ software (<http://rsbweb.nih.gov/ij/>).  
511 Quantifications of AZs (scored via BRP) were performed following an adjusted manual<sup>88</sup>,  
512 briefly as follows. The signal of a HRP-Cy5 antibody was used as template for a mask,  
513 restricting the quantified area to the shape of the NMJ. The original confocal stacks were  
514 converted to maximal projections, and after background subtraction, a mask of the synaptic area  
515 was created by applying a certain threshold to remove the irrelevant lower intensity pixels. The  
516 segmentation of single spots was done semi-automatically via the command “Find Maxima”  
517 embedded in the ImageJ software and by hand with the pencil tool and a line thickness of 1  
518 pixel. To remove high frequency noise a Gaussian blur filter (0.5 pixel Sigma radius) was  
519 applied. The processed picture was then transformed into a binary mask using the same lower  
520 threshold value as in the first step. This binary mask was then projected onto the original  
521 unmodified image using the “min” operation from the ImageJ image calculator. For spots/ $\mu\text{m}^2$   
522 the number of spots was divided by the size of the mask of the synaptic area.

523 For colocalization analysis (Pearson correlation coefficient) the ImageJ plugin “JACOP”  
524 (<http://rsb.info.nih.gov/ij/plugins/track/jacop2.html>) was used. To determine the synaptic protein  
525 levels, a custom-written ImageJ script was used that detects the locations with highest local  
526 maxima in pixel values to generate regions of interests (ROIs) and sets a point selection at each.  
527 The intensities were then measured and all selections were deleted, leaving intensity values and  
528 (x,y) locations in the results list. The results list was then used to create a circle of size = 5 pixels  
529 (pixel size 100 nm) centered around each (x,y) location and the integrated density within these  
530 ROIs was measured and taken for further calculations. The same ROIs were then used in the  
531 channel containing signals of the co-stained protein. For scatter plots, co-stainings of BRP either

532 with RBP, Unc13A or Syx-1A with or without PhTx-treatment or Wild-type and *gluRIIA*<sup>Null</sup>  
533 were used. The AZ numbers were counted (number of BRP spots) and the local synaptic levels  
534 of both co-stained proteins were measured. AZs were then sorted into five bins (AZ number  
535 divided by five) depending on their synaptic BRP levels and then the respective second channel  
536 intensities distributed to the appropriate bin. Binned BRP levels were then plotted against binned  
537 levels of the second channel.

538

### 539 **STED Microscopy**

540 Two-color STED images were recorded on custom-built STED-microscopes<sup>89, 90</sup>, which either  
541 combine two pairs of excitation laser beams of 595 nm and 635 nm or 595 nm and 640 nm  
542 wavelength with one STED fiber laser beam at 775 nm. All STED images were acquired using  
543 Inspector Software (Max Planck Innovation GmbH, Germany). STED images were processed  
544 using a linear deconvolution function integrated into Inspector Software (Max Planck  
545 Innovation GmbH, Germany). Regularization parameters ranged from  $1e^{-09}$  to  $1e^{-10}$ . The point  
546 spread function (PSF) for deconvolution was generated by using a 2D Lorentz function with its  
547 half-width and half-length fitted to the half-width and half-length of each individual image. For  
548 Fig. 3C, dual-color STED imaging with time-gated detection was performed using a commercial  
549 Leica SP8 TCS STED microscope (Leica Microsystems, Germany) equipped with a 100x NA  
550 1.4 objective (HC PL Apo CS2; Leica Microsystems, Germany). Briefly, the system includes an  
551 inverted DMI8 CS microscope equipped with a 100x pulsed white light laser (WLL; ~80-ps  
552 pulse width, 80-MHz repetition rate; NKT Photonics, Denmark) with a STED lasers for  
553 depletion (pulsed) at 775 nm. Detection of Alexa594 after excitation at 594 nm and emission  
554 detection of 604-650 nm and Atto647 after excitation at 640 nm at emission of 656 – 751 nm

555 was performed in frame sequential mode. Time-gated detection with Hybrid detectors was set  
556 from 0.3–6 ns for both dyes. Raw data were deconvolved with Huygens Professional software  
557 (Scientific Volume Imaging) using a theoretical point spread function automatically computed  
558 based on pulsed-wave STED optimized function and the specific microscope parameters. Default  
559 deconvolution settings were applied. Images for figures and for finding high-intensity clusters  
560 (see below) were processed with ImageJ software to remove obvious background or neighboring  
561 AZs (if required), enhance brightness/contrast and smoothed (0.5 pixel Sigma radius) using the  
562 Gauss blur function.

563

#### 564 **Classification and Alignment of Single AZs**

565 All analysis described below was done using MATLAB R2016b (Mathworks Inc., MA, USA)  
566 with optional toolboxes, which are indicated in the respective sections. Classification of  
567 individual AZs was achieved by using a custom script to detect the position of cluster centers  
568 (local intensity maxima) in the images where obvious background was removed (only for  
569 Unc13A, BRP, RBP), while the averaging procedure described hereafter was performed on  
570 unretouched images. This code retains only pixels above a defined grey value threshold. For the  
571 analysis of Unc13A stainings shown in Fig. 2f, a threshold value of 25 was used (18 for BRP,  
572 RBP, Syx-1A and Unc-18). All pixel values in the image below this threshold value were set to  
573 zero to remove background noise. We then identified the positions of high-intensity pixel  
574 clusters as local intensity maxima in the images freed from neighboring AZ signal and obvious  
575 noise. This was achieved by finding local maxima in the vertical and horizontal pixel lines. First,  
576 the function searched the first derivative (using the function *diff*) of all pixel columns for zero  
577 values and the changes in the surrounding slopes were considered to identify local maxima. The

578 same procedure was then applied in pixel rows, but only for those pixel column values associated  
579 with a local maximum in the previous step. All single pixels that were associated with a  
580 maximum in both a row and a column were detected using the function *intersect*. To prevent  
581 detection of the same cluster more than once, a defined minimum distance of clusters was used  
582 (50 nm for BRP, Unc13A, Syx-1A and RBP, 20 nm for RBP) and only the local maximum with  
583 the highest intensity value was considered. All subsequent translation and averaging procedures  
584 were performed on the non-cleaned images of the same AZs using the determined classification  
585 and positions of clusters. The non-cleaned AZs were sorted by the number of protein clusters  
586 detected this way. To calculate the center of mass of all coordinates, the means of all x- and y-  
587 coordinates were taken according to equations (1) and (2).

$$588 \quad (1) \quad Sx = n^{-1} \cdot \sum_1^n x_{obs}(n)$$

$$589 \quad (2) \quad Sy = n^{-1} \cdot \sum_1^n y_{obs}(n)$$

590 Where (Sx,Sy) is the (x,y)-coordinate center of mass in the initial image, n is the number of  
591 identified clusters, and  $x_{obs}(n)$  and  $y_{obs}(n)$  are the positions of the  $n^{th}$  cluster in the present image.  
592 To align the center of mass to the center of the image, the necessary shift ( $\Delta x$  and  $\Delta y$ ) of the  
593 original coordinates was calculated according to equations (3) and (4) and used subsequently in  
594 equations (5) and (6).

$$595 \quad (3) \quad \Delta x = 0.5 \cdot imsize(x) - Sx$$

$$596 \quad (4) \quad \Delta y = 0.5 \cdot imsize(y) - Sy$$

$$597 \quad (5) \quad x_{centered}(n) = x_{obs}(n) + \Delta x$$

$$598 \quad (6) \quad y_{centered}(n) = y_{obs}(n) + \Delta y$$

599 In equations (3) and (4), “imsize” refers to the size of the image in x or y dimension. The  
600 resulting coordinates  $x_{centered}$  and  $y_{centered}$  represent cluster coordinates after shifting the original

601 coordinates  $x_{obs}$  and  $y_{obs}$ . The same translation was applied to the corresponding AZ image (using  
602 the function *imtranslate*, part of the ‘Image Processing’ toolbox). Clusters were ranked in a  
603 counter-clockwise sequence in all images (see illustration in Fig. 2b; Supplementary Fig. 3c) by  
604 sorting them for increasing angle between the image center and the cluster location in relation to  
605 the vertical midline ( $x=26$ ).

606 To align protein cluster coordinates between all investigated AZs, central rotation (around  
607 the image center,  $x_{middle}=y_{middle}=26$ ), was done using the operation in equation (7).

$$608 \quad (7) \quad \begin{pmatrix} x_{rotated}(n) \\ y_{rotated}(n) \end{pmatrix} = \left[ \begin{pmatrix} x_{centered}(n) \\ y_{centered}(n) \end{pmatrix} - \begin{pmatrix} x_{middle} \\ y_{middle} \end{pmatrix} \right] \cdot \begin{pmatrix} \cos(\alpha) & -\sin(\alpha) \\ \sin(\alpha) & \cos(\alpha) \end{pmatrix} + \begin{pmatrix} x_{middle} \\ y_{middle} \end{pmatrix}$$

609 To find the optimal angle to overlay all AZs, a cost reflecting the sum of distances between  
610 cluster positions of the same rank in all images was minimized. The cost function was defined as  
611 described in equation (8).

$$612 \quad (8) \quad cost = \sum_{n=1}^{totClusters} \sum_{m=1}^{totImgs} \sum_{l=1}^{totImgs} ((x_{rotated}(n, m) - x_{rotated}(n, l))^2 + \\ 613 \quad (y_{rotated}(n, m) - y_{rotated}(n, l))^2)$$

614 In equation (8),  $n$  is the cluster number, *totClusters* is the total cluster number of the respective  
615 category of images,  $m$  and  $l$  are particular AZ images in the stack of images from one category,  
616 and *totImgs* is the total number of AZ images in that category. The squared Euclidean distances  
617 were found by using the function *pdist*.

618 The optimal rotation angle was found using a genetic algorithm function (*ga*, part of the  
619 ‘Global Optimization’ toolbox). The rotation angles evaluated were constrained in a range from -  
620 180 to 180 degrees. For faster optimization, parallelization (setting the option ‘UseParallel’ to  
621 ‘true’; this requires the ‘Parallel Computing’ toolbox) was employed to evaluate 500 individual  
622 cost functions per generation. Cluster coordinates from all images in one category were rotated

623 simultaneously. A single individual in the genetic algorithm represented a set of rotation angles  
624 for each image. The convergence criterion (*TolFun*) was left at the default value (a relative cost  
625 value change of less than  $10^{-6}$  over 50 generations). The output of this optimization was a vector  
626 containing all rotation angles that led to the best overlap of cluster coordinates. Finally, these  
627 rotations were then applied to the centered original AZ images. All images aligned this way were  
628 then combined in a stack and an average image was generated by calculating the mean intensity  
629 of all image pixels. For better illustration of the AZ structure, pixel intensities were linearly  
630 scaled such that the highest intensity pixel had a value of 255. The procedure was only  
631 performed if more than two images existed in the same cluster number class for at least 5  
632 consecutive cluster number classes. The histograms shown in Fig. 2c,d,e and supplementary Fig.  
633 2a were generated by counting the number of images in each cluster number class, and dividing  
634 each value by the total amount of images detected in all classes. The mean cluster intensity was  
635 calculated by taking the differences between the mean image intensities in consecutive classes,  
636 and averaging them.

637 To investigate the AZ structure in an approach independent of the cluster-distance  
638 minimization procedure described above, we repeated the averaging in a different way as  
639 follows. We developed a MATLAB code for AZ centering and alignment by rotation of the  
640 highest intensity pixel to identical angles and therefore similar positions, which yielded  
641 qualitatively similar results (Supplementary Fig. 3a). Again, high-intensity clusters were found in  
642 AZ images cleaned from obvious noise and bordering AZs, and all translations and rotations  
643 were then performed on unretouched images. The center of mass of the found cluster coordinates  
644 was calculated and the image shifted so that the center of mass of the coordinates was in the  
645 center of the 51 by 51 pixel space ( $x=y=26$ ; see equations (1) to (6)). The brightest point in each

646 image was then found by sorting the list of intensities of all clusters found. Only this point was  
647 then considered for rotation. To determine the angle by which to rotate each image to place this  
648 highest intensity region to the same fixed position (on the vertical midline between the two top  
649 image quadrants), the x and y distances to the center of rotation (equal to the center pixel of the  
650 image  $x=y=26$ ) were calculated to find the length ( $l$ ) of the hypotenuse and the opposite side of  
651 the right triangle. The angle  $\alpha$  in degrees was then calculated by taking the inverse sine in  
652 degrees of this value (MATLAB function *asind*), as shown in equation (9).

$$653 \quad (9) \quad \alpha = \sin^{-1} \left( \frac{l_{\text{opposite side}}}{l_{\text{hypotenuse}}} \right)$$

654 In cases where the brightest peak was located above the horizontal midline, the adjacent side of  
655 the triangle was the vertical midline. In cases where the brightest peak was located below the  
656 horizontal midline, the angle was calculated with the horizontal midline being the adjacent side,  
657 and  $90^\circ$  were added to the final angle value. Additionally, in cases where the brightest peak was  
658 located to the right of the vertical midline, the angle was multiplied with -1. To generate the  
659 results shown in Supplementary Fig. 3b, which shows the averaging of AZ images within  
660 randomly assigned categories, we generated a number of random category values and then  
661 proceeded with the averaging procedure described above. For this, we reproduced the  
662 distribution of category values from the AZ dataset according to the histogram values of the  
663 category vector as follows. A histogram of the category vector was generated (MATLAB  
664 function *histogram*) with a bin width of 1, yielding the absolute amount of AZs per category. A  
665 cumulative sum vector was calculated from these histogram values (MATLAB  
666 function *cumsum*). For each position in the category vector, we then chose a random number  
667 between 0 and 1 and multiplied it by the number of images considered in the category vector. We  
668 then found the first position in the cumulative sum vector that was larger than this random value.

669 The position found was equal to the assigned category. This resulted in a randomly assigned  
670 category vector with a similar distribution of categories as the original vector.

671

### 672 ***In vivo* live imaging and analysis**

673 *In vivo* imaging of intact *Drosophila* larvae was performed as previously described<sup>91</sup>. Briefly, 3<sup>rd</sup>  
674 instar larvae were put into a drop of Voltalef H10S oil (Arkema, Inc., France) within an airtight  
675 imaging chamber. Before imaging, the larvae were anaesthetized with 20 short pulses of a  
676 desflurane (Baxter, IL, USA) air mixture until the heartbeat completely stopped. For assessing  
677 axonal transport, axons immediately after exiting the ventral nerve cord were imaged for 5 min  
678 using timelapse confocal microscopy. Kymographs were plotted using a custom-written ImageJ  
679 script.

680

### 681 **Dissection, Induction of Homeostatic Plasticity and Electrophysiology**

682 Third-instar larvae were selected and placed individually on a Sylgard block. Using a very sharp  
683 pin, the tail of the larva was pinned between the posterior spiracles, in the absence of solution.  
684 The head was pinned, making sure not to stretch the larva, so that the animal was relatively loose  
685 between the two pins. A small horizontal incision was made in the dorsal cuticle at the tail with a  
686 sharp scissors. The larva was cut vertically from the tail incision in an anterior direction (towards  
687 the head), continuing beyond the head pin. Great care was taken not to stretch the cuticle or  
688 animal during this process. 40  $\mu$ l of a 20  $\mu$ M PhTx in modified hemolymph-like solution (HL3;  
689 <sup>92</sup> composition (in mM): NaCl 70, KCl 5, MgCl<sub>2</sub> 10, NaHCO<sub>3</sub> 10, trehalose 5, sucrose 115,  
690 HEPES 5, CaCl<sub>2</sub> 0, pH adjusted to 7.2) was pipetted into the abdominal cavity with minimal  
691 force, making sure to fill the abdomen. After 10 minutes incubation, the preparation was



692 completed without rinsing. The cuticle was gently pinned twice on each side (without  
693 stretching). The connection of the intestines and trachea to the body at the posterior were cut.  
694 Holding the now free ends of the intestines and trachea with a fine forceps, remaining  
695 connections were cut moving in an anterior direction (towards the head). The intestines and  
696 trachea could then be gently removed without stretching the larva. Finally, the brain was held  
697 firmly and slightly raised above the body so that the scissors could be placed underneath to cut  
698 the segmental nerves. Care was taken not to touch the underlying muscle and to avoid excessive  
699 pulling of the nerves before they were cut. The completed preparation was rinsed 3 times with  
700 PhTx-free HL3 (0 mM CaCl<sub>2</sub>, 10 mM MgCl<sub>2</sub>). PhTx-free HL3 solution was used in control  
701 treatments. Sylgard blocks were kept separate for PhTx and control treatments and all  
702 implements were rinsed after each recording.

703 The Sylgard block and completed larval preparation was placed in the recording chamber  
704 which was filled with 2 ml HL3 (0.4 mM CaCl<sub>2</sub>, 10 mM MgCl<sub>2</sub>). Recordings were performed at  
705 room temperature (~22°C) in current clamp mode at muscle 6 in segments A2/A3 as previously  
706 described<sup>93</sup> using an Axon Digidata 1550A digitizer, Axoclamp 900A amplifier with HS-9A x0.1  
707 headstage (Molecular Devices, CA, USA) and on a BX51WI Olympus microscope with a 40X  
708 LUMPlanFL/IR water immersion objective. Sharp intracellular recording electrodes were pulled  
709 using a Flaming Brown Model P-97 micropipette puller (Sutter Instrument, CA, USA) with a  
710 resistance of 20-35 MΩ, back-filled with 3 M KCl. Cells were only considered with a membrane  
711 potential less than -60 mV and membrane resistances greater than 4 MΩ. All recordings were  
712 acquired using Clampex software (v10.5) and sampled at 10-50 kHz, filtering with a 5 kHz low-  
713 pass filter. mEPSPs were recorded for 1 minute. eEPSPs were recorded by stimulating the  
714 appropriate nerve at 0.1 Hz, 5 times (8 V, 300 μs pulse) using an ISO-STIM 01D stimulator (NPI

715 Electronic, Germany). Stimulating suction electrodes were pulled on a DMZ-Universal Puller  
716 (Zeitz-Instruments GmbH, Germany) and fire polished using a CPM-2 microforge (ALA  
717 Scientific, NY, USA). A maximum of two cells were recorded per animal.

718 Analysis was performed with Clampfit 10.5 and Graphpad Prism 6 software. mEPSPs were  
719 further filtered with a 500 Hz Gaussian low-pass filter. Using a single template for all cells,  
720 mEPSPs were identified and analyzed, noting the mean mEPSP amplitude per cell. For Fig. 5  
721 and Supplementary Fig. 7, templates were generated for each cell and the first 30 mEPSPs were  
722 identified and taken into account for further analysis. An average trace was generated from the 5  
723 eEPSP traces per cell. The amplitude of the average eEPSP trace was divided by the mean  
724 mEPSP amplitude, for each respective cell, to determine the quantal content.

725 Dissection and current clamp recordings of w1118 vs *gluRIIA*<sup>Null</sup> were performed as above  
726 in male third-instar larvae. Cells with an initial membrane potential greater than -55 mV,  
727 resistances less than 5 M $\Omega$  or multiple responses to a single stimulus were rejected. eEPSPs were  
728 recorded by stimulating the appropriate nerve at 0.2 Hz, 10 times (6 V, 300  $\mu$ s pulse). An  
729 average eEPSP amplitude was calculated from the 10 traces. mEPSPs were analysed with a  
730 genotype specific template. Quantal contents were calculated by dividing the mean eEPSP by  
731 mean mEPSP for each cell.

732

### 733 **In Vivo Two-Photon Live Calcium Imaging and Analysis**

734 Two-photon imaging of odor-evoked calcium responses was conducted in 3 to 5-day-old mixed-  
735 sex flies expressing LexAop-GCaMP6f in VT1211-LexA. For imaging, flies were briefly  
736 anesthetized on ice and mounted in a custom made chamber by immobilizing wings, head and  
737 proboscis with wax. The head capsule was opened in sugar-free HL3-like extracellular saline<sup>94</sup>.

738 Odor stimulation consisted of a 1.5 s OCT pulse followed by a 30 s break and then a 1.5 s MCH  
739 pulse followed again by another 30 s break. This alternating odor pulse protocol was  
740 consecutively repeated five times (odor dilution in mineral oil 1/1000). Odors were delivered on  
741 a clean air carrier stream and image acquisition and odor stimulation was synchronized  
742 temporally using a custom-designed system. Fluorescence was centered on 910 nm generated by  
743 a Ti-Sapphire laser (Chameleon Ultra II, Coherent, CA, USA). Images with a pixel size of 0.3 x  
744 0.3 $\mu$ m were acquired at 70 Hz using two-photon microscopy (Femto2D-Resonant by Femtonics  
745 Ltd., Hungary) with a 20X, 1.0 NA water-immersion objective, controlled by MESc v3.5  
746 software (Femtonics Ltd., Hungary). For each animal, a single hemisphere was analyzed. All  
747 OCT and MCH responses of a fly were averaged respectively and resulting traces were averaged  
748 between flies. Mean intensity values of two-photon fluorescence were calculated, while F0 was  
749 defined as the mean F from 0 to 1.5s at the beginning of a recording (MESc v 3.5 software).  
750 Image processing for single frames were manually performed using ImageJ (images did not  
751 require registration).

752

### 753 **Odor avoidance conditioning**

754 All flies were 3 to 5 days old, raised in 12 h:12 h, light:dark cycle and at 65% relative humidity.  
755 One day before the experiment, the flies were transferred to fresh food vials. One hour prior to  
756 the experiment, flies were pre-conditioned to experimental conditions (dim red light, 25°C,  
757 humidity of 80%). The aversive odors 3-Octanol (OCT) and Methylcyclohexanol (MCH) were  
758 diluted 1:100 in paraffin oil and presented in 14 mm cups. A current of 120V AC was used as a  
759 behavioral reinforcer. The associative training was performed as previously described<sup>95</sup>. In a  
760 single-cycle training, nearly 100 flies were presented with one odor (CS<sup>+</sup>) paired with electrical

761 shock (US; 12 times for one minute). After one minute of pure air-flow, the second odor was  
762 presented without the shock (CS<sup>-</sup>) for another minute. The flies were then immediately tested for  
763 short-term memory performance by presenting them the two odors together. A performance  
764 index (PI) was calculated as the number of flies choosing the odor without shock (CS<sup>-</sup>), minus  
765 the number of flies choosing the odor paired with shock (CS<sup>+</sup>), divided by the total number of  
766 flies, multiplied by 100. The values of PI ranges from 0 to 100 where 0 means no learning (50:50  
767 distribution of flies) and a value of 100 means complete learning (all flies avoided the  
768 conditioned odor). The final learning index was calculated as the average of both reciprocal  
769 indices for the two odors. Odor Avoidance experiments were used to test innate behavior where  
770 each odor was presented to the flies without conditioning. The PIs were calculated as stated  
771 above.

772

### 773 **Quantification and Statistical Analysis**

774 Data were analyzed using Prism (GraphPad Software, CA, USA). Per default Student's t test was  
775 performed to compare the means of two groups unless the data were either non-normally  
776 distributed (as assessed D'Agostino-Pearson omnibus normality test) or if variances were  
777 unequal (assessed by F test) in which case they were compared by a Mann-Whitney U Test.  
778 However, in supplementary table 1 both tests are provided for all relevant cases. For comparison  
779 of more than two groups, one-way analysis of variance (ANOVA) tests were used, followed by a  
780 Tukey's multiple comparison test. P values and N values are given in Supplementary table 1.  
781 Means are annotated  $\pm$  s.e.m.. Asterisks are used to denote significance: \*,  $p < 0.05$ ; \*\*,  $p < 0.01$ ;  
782 \*\*\*,  $p < 0.001$ ; n.s. (not significant),  $p > 0.05$ .

783

784 **Data and Software Availability**

785 The data that support the findings of this study as well as MATLAB and ImageJ codes used in  
786 this study are available from Alexander M. Walter ([awalter@fmp-berlin.de](mailto:awalter@fmp-berlin.de)) upon request.

787

788 **Contact for Reagent and Resource Sharing**

789 Informations and requests for resources and reagents should be directed to and will be fulfilled  
790 by the Lead Contact, Alexander M. Walter ([awalter@fmp-berlin.de](mailto:awalter@fmp-berlin.de)).

791 **References**

- 792 1. Luscher, C. & Malenka, R.C. NMDA receptor-dependent long-term potentiation and  
793 long-term depression (LTP/LTD). *Cold Spring Harb Perspect Biol* **4** (2012).
- 794 2. Nicoll, R.A. & Roche, K.W. Long-term potentiation: peeling the onion.  
795 *Neuropharmacology* **74**, 18-22 (2013).
- 796 3. Reddy-Alla, S., *et al.* Stable Positioning of Unc13 Restricts Synaptic Vesicle Fusion to  
797 Defined Release Sites to Promote Synchronous Neurotransmission. *Neuron* **95**, 1350-  
798 1364 e1312 (2017).
- 799 4. Sakamoto, H., *et al.* Synaptic weight set by Munc13-1 supramolecular assemblies. *Nat*  
800 *Neurosci* **21**, 41-49 (2018).
- 801 5. Tang, A.H., *et al.* A trans-synaptic nanocolumn aligns neurotransmitter release to  
802 receptors. *Nature* **536**, 210-214 (2016).
- 803 6. Acuna, C., Liu, X. & Sudhof, T.C. How to Make an Active Zone: Unexpected Universal  
804 Functional Redundancy between RIMs and RIM-BPs. *Neuron* **91**, 792-807 (2016).
- 805 7. Bohme, M.A., *et al.* Active zone scaffolds differentially accumulate Unc13 isoforms to  
806 tune Ca(2+) channel-vesicle coupling. *Nat Neurosci* **19**, 1311-1320 (2016).
- 807 8. Kittel, R.J., *et al.* Bruchpilot promotes active zone assembly, Ca<sup>2+</sup> channel clustering,  
808 and vesicle release. *Science* **312**, 1051-1054 (2006).
- 809 9. Liu, K.S., *et al.* RIM-binding protein, a central part of the active zone, is essential for  
810 neurotransmitter release. *Science* **334**, 1565-1569 (2011).
- 811 10. Sudhof, T.C. The presynaptic active zone. *Neuron* **75**, 11-25 (2012).
- 812 11. Wang, S.S., *et al.* Fusion Competent Synaptic Vesicles Persist upon Active Zone  
813 Disruption and Loss of Vesicle Docking. *Neuron* **91**, 777-791 (2016).
- 814 12. Walter, A.M., Bohme, M.A. & Sigrist, S.J. Vesicle release site organization at synaptic  
815 active zones. *Neurosci Res* **127**, 3-13 (2018).
- 816 13. Davis, G.W. & Muller, M. Homeostatic control of presynaptic neurotransmitter release.  
817 *Annual review of physiology* **77**, 251-270 (2015).
- 818 14. Frank, C.A. Homeostatic plasticity at the *Drosophila* neuromuscular junction.  
819 *Neuropharmacology* **78**, 63-74 (2014).
- 820 15. Bruckner, J.J., *et al.* Fife organizes synaptic vesicles and calcium channels for high-  
821 probability neurotransmitter release. *J Cell Biol* **216**, 231-246 (2017).
- 822 16. Muller, M., Genc, O. & Davis, G.W. RIM-binding protein links synaptic homeostasis to  
823 the stabilization and replenishment of high release probability vesicles. *Neuron* **85**, 1056-  
824 1069 (2015).
- 825 17. Muller, M., Liu, K.S., Sigrist, S.J. & Davis, G.W. RIM controls homeostatic plasticity  
826 through modulation of the readily-releasable vesicle pool. *The Journal of neuroscience :  
827 the official journal of the Society for Neuroscience* **32**, 16574-16585 (2012).
- 828 18. Weyhersmuller, A., Hallermann, S., Wagner, N. & Eilers, J. Rapid active zone  
829 remodeling during synaptic plasticity. *The Journal of neuroscience : the official journal  
830 of the Society for Neuroscience* **31**, 6041-6052 (2011).
- 831 19. Frank, C.A., Kennedy, M.J., Goold, C.P., Marek, K.W. & Davis, G.W. Mechanisms  
832 underlying the rapid induction and sustained expression of synaptic homeostasis. *Neuron*  
833 **52**, 663-677 (2006).
- 834 20. Goel, P., Li, X. & Dickman, D. Disparate Postsynaptic Induction Mechanisms Ultimately  
835 Converge to Drive the Retrograde Enhancement of Presynaptic Efficacy. *Cell Rep* **21**,  
836 2339-2347 (2017).

- 837 21. Ortega, J.M., Genc, O. & Davis, G.W. Molecular mechanisms that stabilize short term  
838 synaptic plasticity during presynaptic homeostatic plasticity. *Elife* **7** (2018).
- 839 22. Petersen, S.A., Fetter, R.D., Noordermeer, J.N., Goodman, C.S. & DiAntonio, A. Genetic  
840 analysis of glutamate receptors in *Drosophila* reveals a retrograde signal regulating  
841 presynaptic transmitter release. *Neuron* **19**, 1237-1248 (1997).
- 842 23. DiAntonio, A., Petersen, S.A., Heckmann, M. & Goodman, C.S. Glutamate receptor  
843 expression regulates quantal size and quantal content at the *Drosophila* neuromuscular  
844 junction. *The Journal of neuroscience : the official journal of the Society for  
845 Neuroscience* **19**, 3023-3032 (1999).
- 846 24. Ehmann, N., *et al.* Quantitative super-resolution imaging of Bruchpilot distinguishes  
847 active zone states. *Nature communications* **5**, 4650 (2014).
- 848 25. Wilhelm, B.G., *et al.* Composition of isolated synaptic boutons reveals the amounts of  
849 vesicle trafficking proteins. *Science* **344**, 1023-1028 (2014).
- 850 26. Akins, M.R., Berk-Rauch, H.E. & Fallon, J.R. Presynaptic translation: stepping out of the  
851 postsynaptic shadow. *Front Neural Circuits* **3**, 17 (2009).
- 852 27. Tsurudome, K., *et al.* The *Drosophila* miR-310 cluster negatively regulates synaptic  
853 strength at the neuromuscular junction. *Neuron* **68**, 879-893 (2010).
- 854 28. Wairkar, Y.P., *et al.* Unc-51 controls active zone density and protein composition by  
855 downregulating ERK signaling. *The Journal of neuroscience : the official journal of the  
856 Society for Neuroscience* **29**, 517-528 (2009).
- 857 29. Johnson, E.L., 3rd, Fetter, R.D. & Davis, G.W. Negative regulation of active zone  
858 assembly by a newly identified SR protein kinase. *PLoS Biol* **7**, e1000193 (2009).
- 859 30. Nieratschker, V., *et al.* Bruchpilot in ribbon-like axonal agglomerates, behavioral defects,  
860 and early death in SRPK79D kinase mutants of *Drosophila*. *PLoS Genet* **5**, e1000700  
861 (2009).
- 862 31. Siebert, M., *et al.* A high affinity RIM-binding protein/Aplip1 interaction prevents the  
863 formation of ectopic axonal active zones. *Elife* **4** (2015).
- 864 32. Klinedinst, S., Wang, X., Xiong, X., Haenfler, J.M. & Collins, C.A. Independent  
865 pathways downstream of the Wnd/DLK MAPKKK regulate synaptic structure, axonal  
866 transport, and injury signaling. *The Journal of neuroscience : the official journal of the  
867 Society for Neuroscience* **33**, 12764-12778 (2013).
- 868 33. Horiuchi, D., Barkus, R.V., Pilling, A.D., Gassman, A. & Saxton, W.M. APLIP1, a  
869 kinesin binding JIP-1/JNK scaffold protein, influences the axonal transport of both  
870 vesicles and mitochondria in *Drosophila*. *Curr Biol* **15**, 2137-2141 (2005).
- 871 34. Bruckner, J.J., *et al.* Fife, a *Drosophila* Piccolo-RIM homolog, promotes active zone  
872 organization and neurotransmitter release. *The Journal of neuroscience : the official  
873 journal of the Society for Neuroscience* **32**, 17048-17058 (2012).
- 874 35. Dai, Y., *et al.* SYD-2 Liprin-alpha organizes presynaptic active zone formation through  
875 ELKS. *Nat Neurosci* **9**, 1479-1487 (2006).
- 876 36. Hallam, S.J., Goncharov, A., McEwen, J., Baran, R. & Jin, Y. SYD-1, a presynaptic  
877 protein with PDZ, C2 and rhoGAP-like domains, specifies axon identity in *C. elegans*.  
878 *Nat Neurosci* **5**, 1137-1146 (2002).
- 879 37. Patel, M.R., *et al.* Hierarchical assembly of presynaptic components in defined *C. elegans*  
880 synapses. *Nat Neurosci* **9**, 1488-1498 (2006).
- 881 38. Fouquet, W., *et al.* Maturation of active zone assembly by *Drosophila* Bruchpilot. *J Cell  
882 Biol* **186**, 129-145 (2009).

- 883 39. Kaufmann, N., DeProto, J., Ranjan, R., Wan, H. & Van Vactor, D. Drosophila liprin-  
884 alpha and the receptor phosphatase Dlar control synapse morphogenesis. *Neuron* **34**, 27-  
885 38 (2002).
- 886 40. Kittelmann, M., *et al.* Liprin-alpha/SYD-2 determines the size of dense projections in  
887 presynaptic active zones in *C. elegans*. *J Cell Biol* **203**, 849-863 (2013).
- 888 41. Oswald, D., *et al.* A Syd-1 homologue regulates pre- and postsynaptic maturation in  
889 Drosophila. *J Cell Biol* **188**, 565-579 (2010).
- 890 42. Holderith, N., *et al.* Release probability of hippocampal glutamatergic terminals scales  
891 with the size of the active zone. *Nat Neurosci* **15**, 988-997 (2012).
- 892 43. Muhammad, K., *et al.* Presynaptic spinophilin tunes neurexin signalling to control active  
893 zone architecture and function. *Nature communications* **6**, 8362 (2015).
- 894 44. Peled, E.S. & Isacoff, E.Y. Optical quantal analysis of synaptic transmission in wild-type  
895 and rab3-mutant Drosophila motor axons. *Nat Neurosci* **14**, 519-526 (2011).
- 896 45. Akbergenova, Y., Cunningham, K.L., Zhang, Y.V., Weiss, S. & Littleton, J.T.  
897 Characterization of developmental and molecular factors underlying release heterogeneity  
898 at Drosophila synapses. *Elife* **7** (2018).
- 899 46. Muller, M. & Davis, G.W. Transsynaptic control of presynaptic Ca(2)(+) influx achieves  
900 homeostatic potentiation of neurotransmitter release. *Curr Biol* **22**, 1102-1108 (2012).
- 901 47. Gratz, S.J., *et al.* Calcium channel levels at single synapses predict release probability and  
902 are upregulated in homeostatic potentiation. *bioRxiv* (2018).
- 903 48. Li, X., *et al.* Synapse-specific and compartmentalized expression of presynaptic  
904 homeostatic potentiation. *Elife* **7** (2018).
- 905 49. Camacho, M., *et al.* Heterodimerization of Munc13 C2A domain with RIM regulates  
906 synaptic vesicle docking and priming. *Nature communications* **8**, 15293 (2017).
- 907 50. Deng, L., Kaeser, P.S., Xu, W. & Sudhof, T.C. RIM proteins activate vesicle priming by  
908 reversing autoinhibitory homodimerization of Munc13. *Neuron* **69**, 317-331 (2011).
- 909 51. Zhou, K., Stawicki, T.M., Goncharov, A. & Jin, Y. Position of UNC-13 in the active zone  
910 regulates synaptic vesicle release probability and release kinetics. *Elife* **2**, e01180 (2013).
- 911 52. Hu, Z., Tong, X.J. & Kaplan, J.M. UNC-13L, UNC-13S, and Tomosyn form a protein  
912 code for fast and slow neurotransmitter release in *Caenorhabditis elegans*. *Elife* **2**, e00967  
913 (2013).
- 914 53. Dulubova, I., *et al.* A Munc13/RIM/Rab3 tripartite complex: from priming to plasticity?  
915 *The EMBO journal* **24**, 2839-2850 (2005).
- 916 54. Rizo, J. & Xu, J. The Synaptic Vesicle Release Machinery. *Annual review of biophysics*  
917 **44**, 339-367 (2015).
- 918 55. Kandel, E.R., Dudai, Y. & Mayford, M.R. The molecular and systems biology of  
919 memory. *Cell* **157**, 163-186 (2014).
- 920 56. Krashes, M.J., Keene, A.C., Leung, B., Armstrong, J.D. & Waddell, S. Sequential use of  
921 mushroom body neuron subsets during drosophila odor memory processing. *Neuron* **53**,  
922 103-115 (2007).
- 923 57. Oswald, D., *et al.* Activity of defined mushroom body output neurons underlies learned  
924 olfactory behavior in Drosophila. *Neuron* **86**, 417-427 (2015).
- 925 58. Aso, Y., *et al.* The neuronal architecture of the mushroom body provides a logic for  
926 associative learning. *Elife* **3**, e04577 (2014).
- 927 59. Quinn, W.G. & Dudai, Y. Memory phases in Drosophila. *Nature* **262**, 576-577 (1976).



- 928 60. Citri, A. & Malenka, R.C. Synaptic plasticity: multiple forms, functions, and  
929 mechanisms. *Neuropsychopharmacology : official publication of the American College of*  
930 *Neuropsychopharmacology* **33**, 18-41 (2008).
- 931 61. Takeuchi, T., Duzkiewicz, A.J. & Morris, R.G. The synaptic plasticity and memory  
932 hypothesis: encoding, storage and persistence. *Philos Trans R Soc Lond B Biol Sci* **369**,  
933 20130288 (2014).
- 934 62. Castillo, P.E. Presynaptic LTP and LTD of excitatory and inhibitory synapses. *Cold*  
935 *Spring Harb Perspect Biol* **4** (2012).
- 936 63. Orr, B.O., Fetter, R.D. & Davis, G.W. Retrograde semaphorin-plexin signalling drives  
937 homeostatic synaptic plasticity. *Nature* **550**, 109-113 (2017).
- 938 64. Wentzel, C., Delvendahl, I., Sydlik, S., Georgiev, O. & Muller, M. Dysbindin links  
939 presynaptic proteasome function to homeostatic recruitment of low release probability  
940 vesicles. *Nature communications* **9**, 267 (2018).
- 941 65. Newman, Z.L., *et al.* Input-Specific Plasticity and Homeostasis at the Drosophila Larval  
942 Neuromuscular Junction. *Neuron* **93**, 1388-1404 e1310 (2017).
- 943 66. Hruska, M., Henderson, N., Le Marchand, S.J., Jafri, H. & Dalva, M.B. Synaptic  
944 nanomodules underlie the organization and plasticity of spine synapses. *Nat Neurosci* **21**,  
945 671-682 (2018).
- 946 67. Bademosi, A.T., *et al.* In vivo single-molecule imaging of syntaxin1A reveals  
947 polyphosphoinositide- and activity-dependent trapping in presynaptic nanoclusters.  
948 *Nature communications* **8**, 13660 (2017).
- 949 68. Sutton, M.A. & Schuman, E.M. Dendritic protein synthesis, synaptic plasticity, and  
950 memory. *Cell* **127**, 49-58 (2006).
- 951 69. Ziv, N.E. Maintaining the active zone: Demand, supply and disposal of core active zone  
952 proteins. *Neurosci Res* **127**, 70-77 (2018).
- 953 70. Sugie, A., *et al.* Molecular Remodeling of the Presynaptic Active Zone of Drosophila  
954 Photoreceptors via Activity-Dependent Feedback. *Neuron* **86**, 711-725 (2015).
- 955 71. Wang, Z., *et al.* Myosin Vb mobilizes recycling endosomes and AMPA receptors for  
956 postsynaptic plasticity. *Cell* **135**, 535-548 (2008).
- 957 72. Puthanveetil, S.V., *et al.* A new component in synaptic plasticity: upregulation of kinesin  
958 in the neurons of the gill-withdrawal reflex. *Cell* **135**, 960-973 (2008).
- 959 73. Brockmann, M.M., *et al.* RIM-BP2 primes synaptic vesicles via recruitment of Munc13-1  
960 at hippocampal mossy fiber synapses. *bioRxiv* (2018).
- 961 74. Lu, J., *et al.* Structural basis for a Munc13-1 homodimer to Munc13-1/RIM heterodimer  
962 switch. *PLoS Biol* **4**, e192 (2006).
- 963 75. Koushika, S.P., *et al.* A post-docking role for active zone protein Rim. *Nat Neurosci* **4**,  
964 997-1005 (2001).
- 965 76. Michelassi, F., Liu, H., Hu, Z. & Dittman, J.S. A C1-C2 Module in Munc13 Inhibits  
966 Calcium-Dependent Neurotransmitter Release. *Neuron* **95**, 577-590 e575 (2017).
- 967 77. Sigrist, S.J., Reiff, D.F., Thiel, P.R., Steinert, J.R. & Schuster, C.M. Experience-  
968 dependent strengthening of Drosophila neuromuscular junctions. *The Journal of*  
969 *neuroscience : the official journal of the Society for Neuroscience* **23**, 6546-6556 (2003).
- 970 78. Schmid, A., *et al.* Activity-dependent site-specific changes of glutamate receptor  
971 composition in vivo. *Nat Neurosci* **11**, 659-666 (2008).
- 972 79. Aberle, H., *et al.* wishful thinking encodes a BMP type II receptor that regulates synaptic  
973 growth in Drosophila. *Neuron* **33**, 545-558 (2002).

- 974 80. Kawasaki, F., Zou, B., Xu, X. & Ordway, R.W. Active zone localization of presynaptic  
975 calcium channels encoded by the cacophony locus of *Drosophila*. *The Journal of*  
976 *neuroscience : the official journal of the Society for Neuroscience* **24**, 282-285 (2004).
- 977 81. Lin, D.M. & Goodman, C.S. Ectopic and increased expression of Fasciclin II alters  
978 motoneuron growth cone guidance. *Neuron* **13**, 507-523 (1994).
- 979 82. Connolly, J.B., *et al.* Associative learning disrupted by impaired Gs signaling in  
980 *Drosophila* mushroom bodies. *Science* **274**, 2104-2107 (1996).
- 981 83. Zars, T., Fischer, M., Schulz, R. & Heisenberg, M. Localization of a short-term memory  
982 in *Drosophila*. *Science* **288**, 672-675 (2000).
- 983 84. Ullrich, A., *et al.* Dynamical Organization of Syntaxin-1A at the Presynaptic Active  
984 Zone. *PLoS computational biology* **11**, e1004407 (2015).
- 985 85. Chen, X., *et al.* The BLOC-1 Subunit Pallidin Facilitates Activity-Dependent Synaptic  
986 Vesicle Recycling. *eNeuro* **4** (2017).
- 987 86. Tully, T., Preat, T., Boynton, S.C. & Del Vecchio, M. Genetic dissection of consolidated  
988 memory in *Drosophila*. *Cell* **79**, 35-47 (1994).
- 989 87. Huang, Y., *et al.* The glycosphingolipid MacCer promotes synaptic bouton formation in  
990 *Drosophila* by interacting with Wnt. *Elife* **7** (2018).
- 991 88. Andlauer, T.F. & Sigrist, S.J. Quantitative analysis of *Drosophila* larval neuromuscular  
992 junction morphology. *Cold Spring Harbor protocols* **2012**, 490-493 (2012).
- 993 89. Gottfert, F., *et al.* Strong signal increase in STED fluorescence microscopy by imaging  
994 regions of subdiffraction extent. *Proceedings of the National Academy of Sciences of the*  
995 *United States of America* **114**, 2125-2130 (2017).
- 996 90. Gottfert, F., *et al.* Coaligned dual-channel STED nanoscopy and molecular diffusion  
997 analysis at 20 nm resolution. *Biophysical journal* **105**, L01-03 (2013).
- 998 91. Fuger, P., Behrends, L.B., Mertel, S., Sigrist, S.J. & Rasse, T.M. Live imaging of synapse  
999 development and measuring protein dynamics using two-color fluorescence recovery  
1000 after photo-bleaching at *Drosophila* synapses. *Nature protocols* **2**, 3285-3298 (2007).
- 1001 92. Stewart, B.A., Atwood, H.L., Renger, J.J., Wang, J. & Wu, C.F. Improved stability of  
1002 *Drosophila* larval neuromuscular preparations in haemolymph-like physiological  
1003 solutions. *Journal of comparative physiology. A, Sensory, neural, and behavioral*  
1004 *physiology* **175**, 179-191 (1994).
- 1005 93. Zhang, B. & Stewart, B. Electrophysiological recording from *Drosophila* larval body-  
1006 wall muscles. *Cold Spring Harbor protocols* **2010**, pdb prot5487 (2010).
- 1007 94. Yoshihara, M. Simultaneous recording of calcium signals from identified neurons and  
1008 feeding behavior of *Drosophila melanogaster*. *J Vis Exp* (2012).
- 1009 95. Tully, T. & Quinn, W.G. Classical conditioning and retention in normal and mutant  
1010 *Drosophila melanogaster*. *Journal of comparative physiology. A, Sensory, neural, and*  
1011 *behavioral physiology* **157**, 263-277 (1985).
- 1012 96. Barnstedt, O., *et al.* Memory-Relevant Mushroom Body Output Synapses Are  
1013 Cholinergic. *Neuron* **89**, 1237-1247 (2016).
- 1014

1015 **Acknowledgements:** We thank S. Waddell and Y. Huang for the VT1211-LexA fly line. M.A.  
1016 Böhme was supported by the SFB 740. A.T. Grasskamp was supported by a NeuroCure Ph.D.  
1017 fellowship funded by the Deutsche Forschungsgemeinschaft (Exc 257) within the International  
1018 Graduate Program Medical Neurosciences. M. Jusyte was supported by an Einstein Center for  
1019 Neurosciences Ph.D. fellowship. U. Rey was supported by a fellowship of the International Max  
1020 Planck Research School by the Max-Planck-Gesellschaft. This work was supported by grants  
1021 from the Deutsche Forschungsgemeinschaft to S.J. Sigrist (Exc 257, TP A3 and A6 SFB 958, TP  
1022 B9/SFB665; TP09/SFB740), A.T. Grasskamp (TRR 186), A.M. Walter (Emmy Noether  
1023 programme, TRR 186), D. Oswald (Emmy Noether programme) and from the National Institutes  
1024 of Health to D. Dickman (NS091546).

1025

1026 **Author Contributions:**

1027 M.A.B, S.J.S and A.M.W conceived the project. M.A.B., A.W.M., C.B.B., P.G. and A.G.P.  
1028 performed fly husbandry and maintenance. M.A.B., M.J., M.L. and P.G. performed confocal  
1029 and/or STED imaging experiments and M.A.B., P.G. and A.T.G. analyzed the data. A.W.M.,  
1030 M.J. and P.G. performed electrophysiological experiments and analyzed the data. U.R.  
1031 performed live-imaging experiments and analysis. P.H. provided reagents and suggested  
1032 additional experiments. A.T.G and A.M.W. developed software codes for image alignment and  
1033 averaging and A.T.G analyzed the data. P.G. and D.D. conceived and performed translation  
1034 block experiments. C.B.B. performed adult *Drosophila* brain antibody staining and imaging.  
1035 C.B.B. and S.H. performed behavioral experiments and data analysis. S.H. performed Western  
1036 blots. D.L. and D.O. planned and performed in vivo two-photon live calcium imaging. F.G. and

1037 S.W.H. developed and built the STED microscope. M.A.B., S.J.S, and A.M.W wrote the paper  
1038 with input from all co-authors.

1039

1040 **COMPETING INTERESTS**

1041 All authors declare no conflicting financial and non-financial interest.

1042

1043 Main Figures and Legends

1044 Figure 1

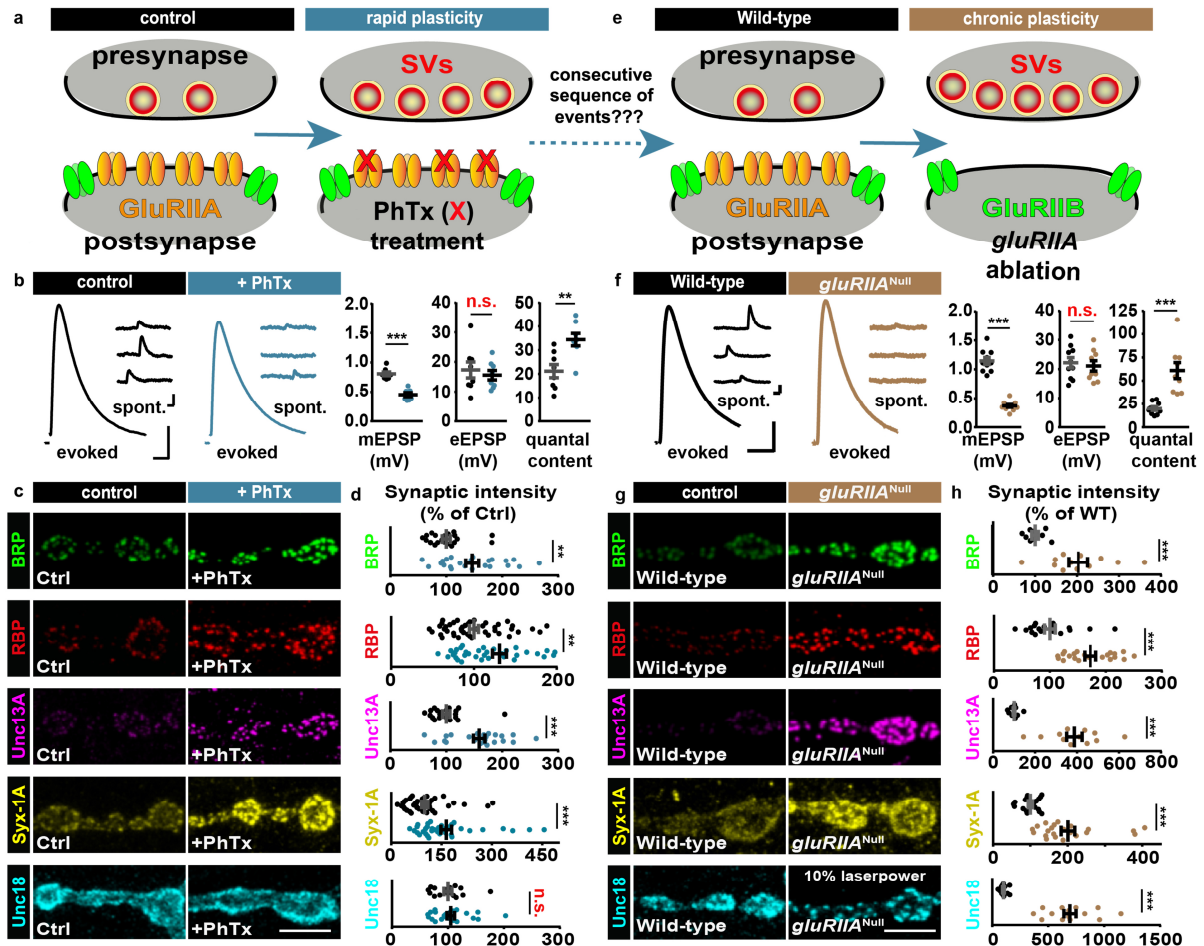

1045

1046 Figure 1: Rapid homeostatic plasticity regulates AZ protein levels.

1047 (a) Sketch of investigated conditions for rapid plasticity: control synapses (left) are compared

1048 with rapid plasticity (10 minutes of PhTx (red “X”); right). Rapid plasticity increases the number

1049 of SVs released (red). (b,f) Representative traces of eEPSP (evoked), mEPSP (spont.) and their

1050 quantification in Ctrl (black) and PhTx (blue) treated (b) or wild-type (black) and *gluRIIA*<sup>Null</sup>

1051 (brown) (f) cells. (c,g) NMJs labelled with indicated antibodies in Ctrl (black) and PhTx (blue)

1052 treated (c) or in wild-type (black) and *gluRIIA*<sup>Null</sup> (brown) (g) animals. (d, h) Quantification of

1053 BRP, RBP, Unc13A, Syx-1A and Unc18 AZ-levels in % of Ctrl in Ctrl (black) and PhTx (blue)

1054 treated (d) or in % of Wild-type (WT) in Wild-type (black) and *gluRIIA*<sup>Null</sup> (brown) (h) animals.  
1055 **(e)** Sketch of investigated conditions for chronic plasticity: Wild-type synapses (left) are  
1056 compared with *gluRIIA*<sup>Null</sup> mutants. Chronic plasticity greatly increases the number of SVs  
1057 released. See also Supplementary Fig. 1. Exact normalized and raw values, detailed statistics  
1058 including sample sizes and P values are listed in Supplementary Table 1. Scale bars: (b,f) eEPSP:  
1059 25 ms, 5 mV; mEPSP: 50 ms, 1 mV; (c,g) 5  $\mu$ m. Statistics: Student's unpaired T-test was used  
1060 for comparisons in (b) and (f) mEPSP amplitude, quantal content and Mann-Whitney U test for  
1061 all other comparisons. \*\*P  $\leq$  0.01; \*\*\*P  $\leq$  0.001; n.s., not significant, P > 0.05. All panels show  
1062 mean  $\pm$  s.e.m.  
1063

1064 **Figure 2**

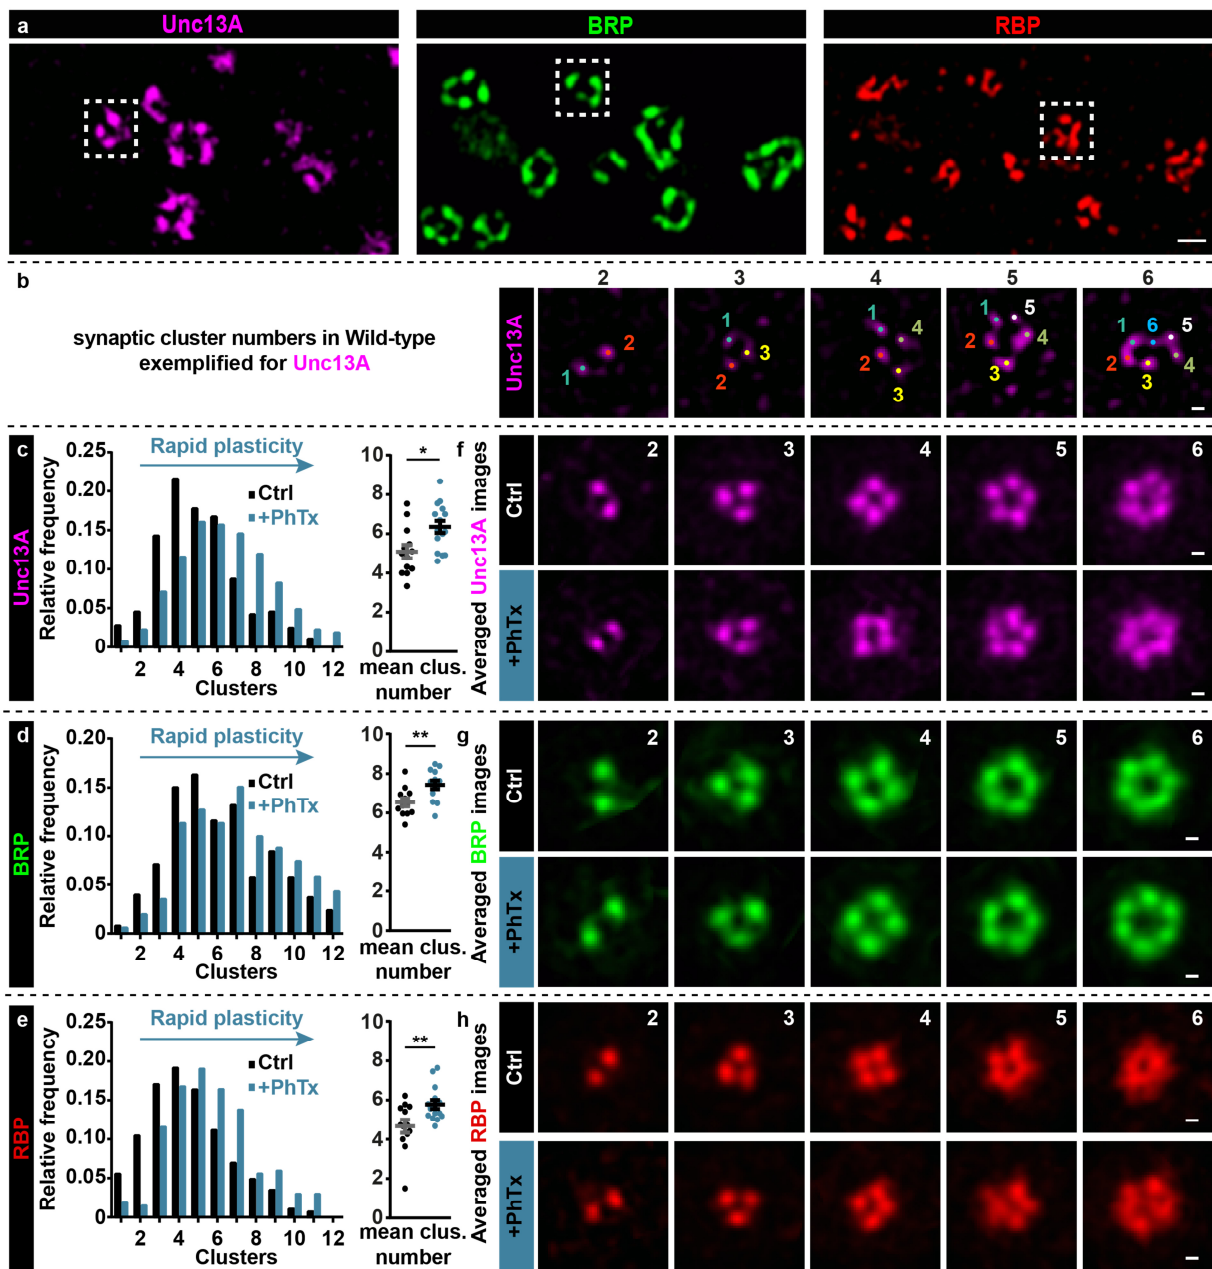

1065

1066 **Figure 2: Rapid plasticity alters Unc13A/BRP/RBP AZ protein cluster number.**

1067 **(a)** STED microscopy images containing several AZs with variable numbers of protein clusters  
 1068 of Unc13A (magenta); BRP (green) and RBP (red). Dashed white boxes mark one AZ example  
 1069 used for the cluster number counting. **(b)** Example AZs with 2-6 Unc13A clusters, marked by

1070 colored dots and used for cluster number counting. **(c-e, left)** Frequency distribution of Unc13A  
1071 (c), BRP (d) and RBP (e) modules per AZ either without (Ctrl, -PhTx; black) or with PhTx  
1072 (+PhTx; blue) treatment. **(f-h)** Average of rotated STED images stained against Unc13A (f),  
1073 BRP (g) and RBP (h) with 2-6 modules either without (Ctrl) or with PhTx (+PhTx) treatment.  
1074 See also Supplementary Figs. 2-4. Exact values, detailed statistics including sample sizes and P  
1075 values are listed in Supplementary Table 1. Scale bars: (a) 200 nm; (b,f-h) 50 nm. Statistics:  
1076 Mann-Whitney U test. n.s., not significant,  $P > 0.05$ . Panels (c-e) show NMJ-wise means of AZ-  
1077 mean  $\pm$  s.e.m.  
1078



1079 **Figure 3**

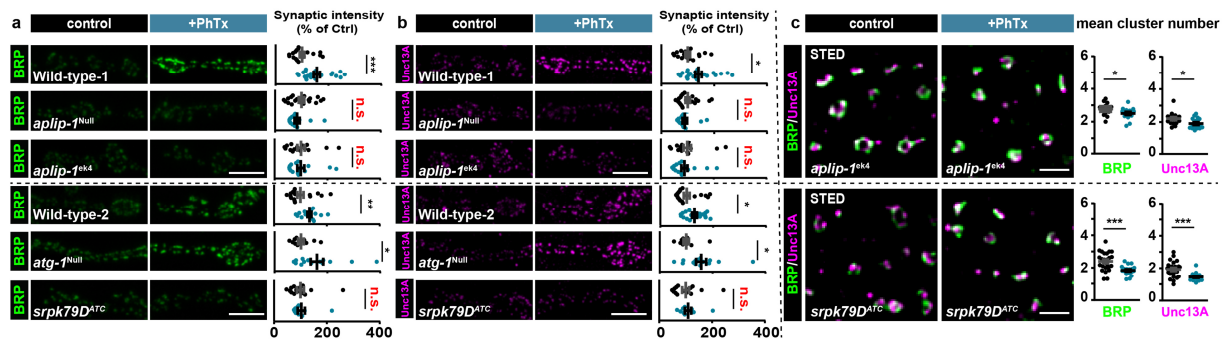

1080

1081 **Figure 3: Rapid AZ-remodeling during homeostatic plasticity requires Aplip-1 and**  
 1082 **Srpk79D.**

1083 **(a,b)** Muscle 4 NMJs of segment A2-A5 from 3rd instar larvae and quantification of synaptic  
 1084 levels of Wild-type – 1, *aplip-1<sup>Null</sup>*, *aplip-1<sup>ek4</sup>*, Wild-type – 2, *atg1* and *srpk79D<sup>ATC</sup>* labelled with  
 1085 the indicated antibodies without (Ctrl; black) and with 10 minutes of PhTx (+PhTx; blue)  
 1086 treatment. Two independent experiments were performed, Wild-type – 1 was used as control for  
 1087 *aplip-1<sup>Null</sup>* and *aplip-1<sup>ek4</sup>* while Wild-type – 2 was used for *atg1<sup>Null</sup>* and *srpk79D<sup>ATC</sup>*. **(c)** Average  
 1088 BRP and Unc13A cluster number per AZ either without (Ctrl, -PhTx; black) or with PhTx  
 1089 (+PhTx; blue) treatment in *aplip-1<sup>ek4</sup>* and *srpk79D<sup>ATC</sup>*. See also Supplementary Figs. 5, 6 and  
 1090 Movie 1. Exact normalized and raw values, detailed statistics including sample sizes and P  
 1091 values are listed in Supplementary Table 1. Scale bars: (a,b) 5 μm; (c) 500nm. Statistics: Mann-  
 1092 Whitney U test. \*  $P \leq 0.05$ ; \*\* $P \leq 0.01$ ; \*\*\* $P \leq 0.001$ ; n.s., not significant,  $P > 0.05$ . All panels  
 1093 show mean  $\pm$  s.e.m.

1094

1095

1096

1097

1098 **Figure 4**

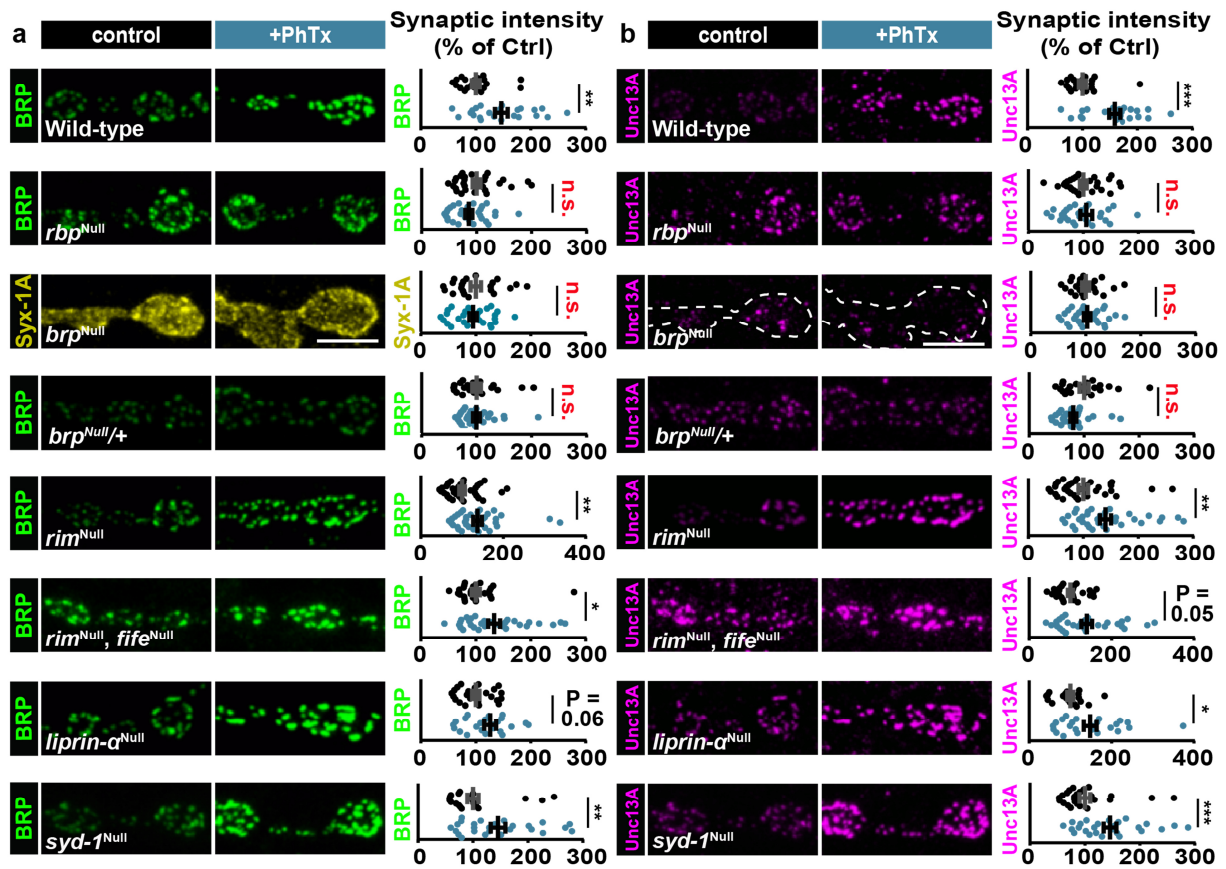

1099

1100 **Figure 4: Rapid AZ-remodeling during homeostatic plasticity requires BRP and RBP.**

1101 **(a,b)** Confocal images and quantification of synaptic intensities of muscle 4 NMJs of abdominal  
 1102 segment 2-4 from 3rd instar larvae at Wild-type,, *rbp*<sup>Null</sup>, *brp*<sup>Null</sup>, *brp*<sup>Null/+</sup>, *rim*<sup>Null</sup>, *rim*<sup>Null</sup> *fife*<sup>Null</sup>,  
 1103 *liprin-α*<sup>Null</sup> and *syd1*<sup>Null</sup> NMJs labelled with the indicated antibodies without (control; black) and  
 1104 with 10 minutes PhTx (+PhTx; blue) treatment. For Wild-type, images and data were adapted  
 1105 and replotted from Fig. 1. Please note, although Wild-type controls were performed in parallel to  
 1106 every mutant genotype to check for functional AZ-remodeling upon PhTx-treatment in each set  
 1107 of experiments, we do not show all WT-control here due to space limitations. Therefore, AZ-  
 1108 protein levels should not be compared between genotypes. Exact normalized and raw values  
 1109 (also of additional Wild-type controls for genotypes where PhTx-treatment failed to induce AZ-

1110 remodeling), detailed statistics including sample sizes and P values are listed in Supplementary  
1111 Table 1. Scale bars: 5  $\mu\text{m}$ . Statistics: Mann-Whitney U test. \*  $P \leq 0.05$ ; \*\* $P \leq 0.01$ ; \*\*\* $P \leq$   
1112 0.001; n.s., not significant,  $P > 0.05$ . All panels show mean  $\pm$  s.e.m.

1113 **Figure 5**

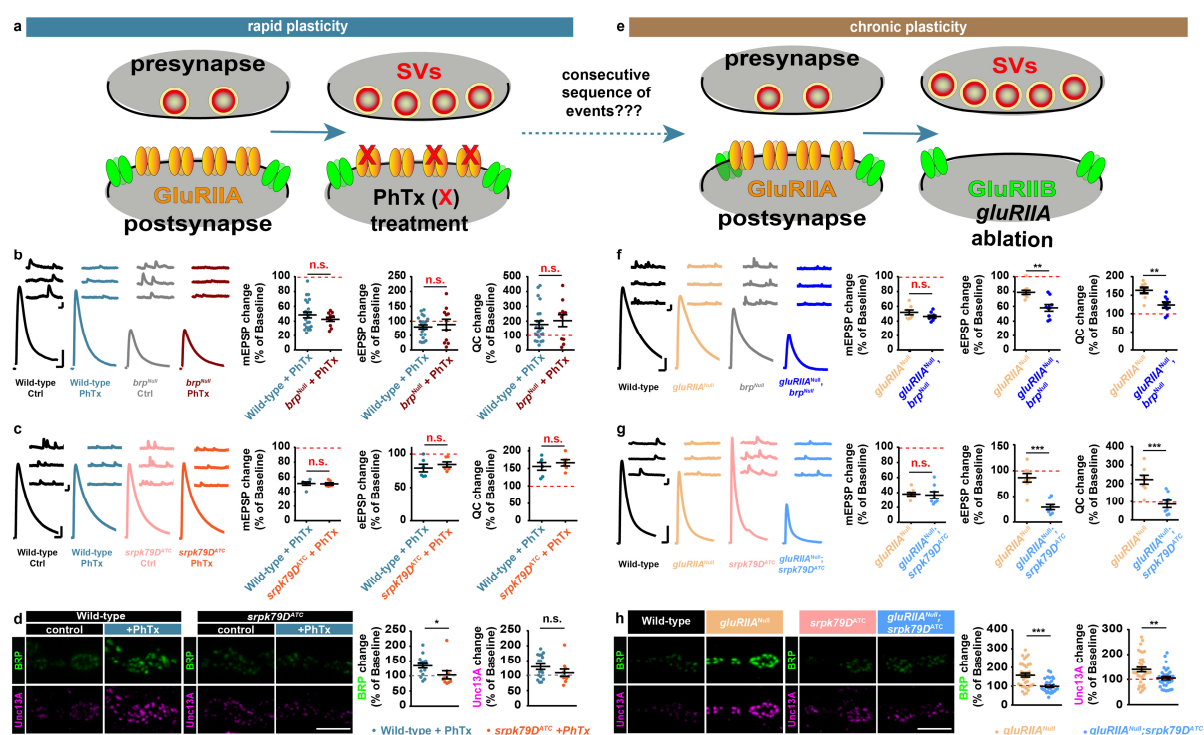

1114

1115 **Figure 5: Structural AZ-remodeling sustains NT-release potentiation over longer**  
 1116 **timescales.**

1117 **(a)** Sketch of investigated conditions for rapid plasticity: control synapses (left) are compared  
 1118 with rapid plasticity (10 minutes of PhTx (red “X”); right). Rapid plasticity increases the number  
 1119 of SVs released (red). **(b,c)** (left) Representative traces of eEPSP (evoked) and mEPSP (spont.)  
 1120 of the indicated genotypes with and without PhTx-treatment. (Right) Quantifications of  
 1121 percentage change of mEPSP amplitude, eEPSP amplitude and quantal content (QC) upon PhTx-  
 1122 treatment. Values are divided by the corresponding measurement in the absence of PhTx for each  
 1123 genotype (dashed red line corresponds to 100%/no change). **(d)** (left) Confocal images of muscle  
 1124 4 NMJs of abdominal segment 2-5 from 3rd instar larvae at Wild-type and *srpk79D<sup>ATC</sup>* NMJs  
 1125 labelled with the indicated antibodies without (control; black) and with 10 minutes PhTx  
 1126 (+PhTx; blue) treatment. (Right) Quantification of percentage change of synaptic BRP and

1127 Unc13A levels in Wild-type (blue) and *srpk79D*<sup>ATC</sup> (orange) upon PhTx-treatment compared to  
1128 baseline of control treatment for each genotype (dashed red line). Data are modified from Fig. 2.  
1129 **(e)** Sketch of investigated conditions for chronic plasticity: Wild-type synapses (left) are  
1130 compared with *gluRIIA*<sup>Null</sup> mutants. Chronic plasticity greatly increases the number of SVs  
1131 released. **(f,g)** Same as in (b,c) but compared to baseline of each control genotype. **(h)** Same as in  
1132 (d) but compared to baseline fluorescence values of Wild-type for *gluRIIA*<sup>Null</sup> and *srpk79D*<sup>ATC</sup>  
1133 for *gluRIIA*<sup>Null</sup>; *srpk79D*<sup>ATC</sup>. See also Supplementary Fig. 7. Exact normalized and raw values,  
1134 detailed statistics including sample sizes and P values are listed in Supplementary Table 1. See  
1135 also Supplementary Figure 10 and 11 for non-normalized values. Scale bars: eEPSP: 25 ms, 5  
1136 mV; mEPSP: 50 ms, 1 mV; (d,h) 5  $\mu$ m. Statistics: Student's unpaired T-test was used for  
1137 comparisons in (b) mEPSP change, (f), (g) and Mann-Whitney U test for all other comparisons.  
1138 \*P  $\leq$  0.05; \*\*P  $\leq$  0.01; \*\*\*P  $\leq$  0.001; n.s., not significant, P > 0.05. All panels show mean  $\pm$   
1139 s.e.m.

1140 **Figure 6**

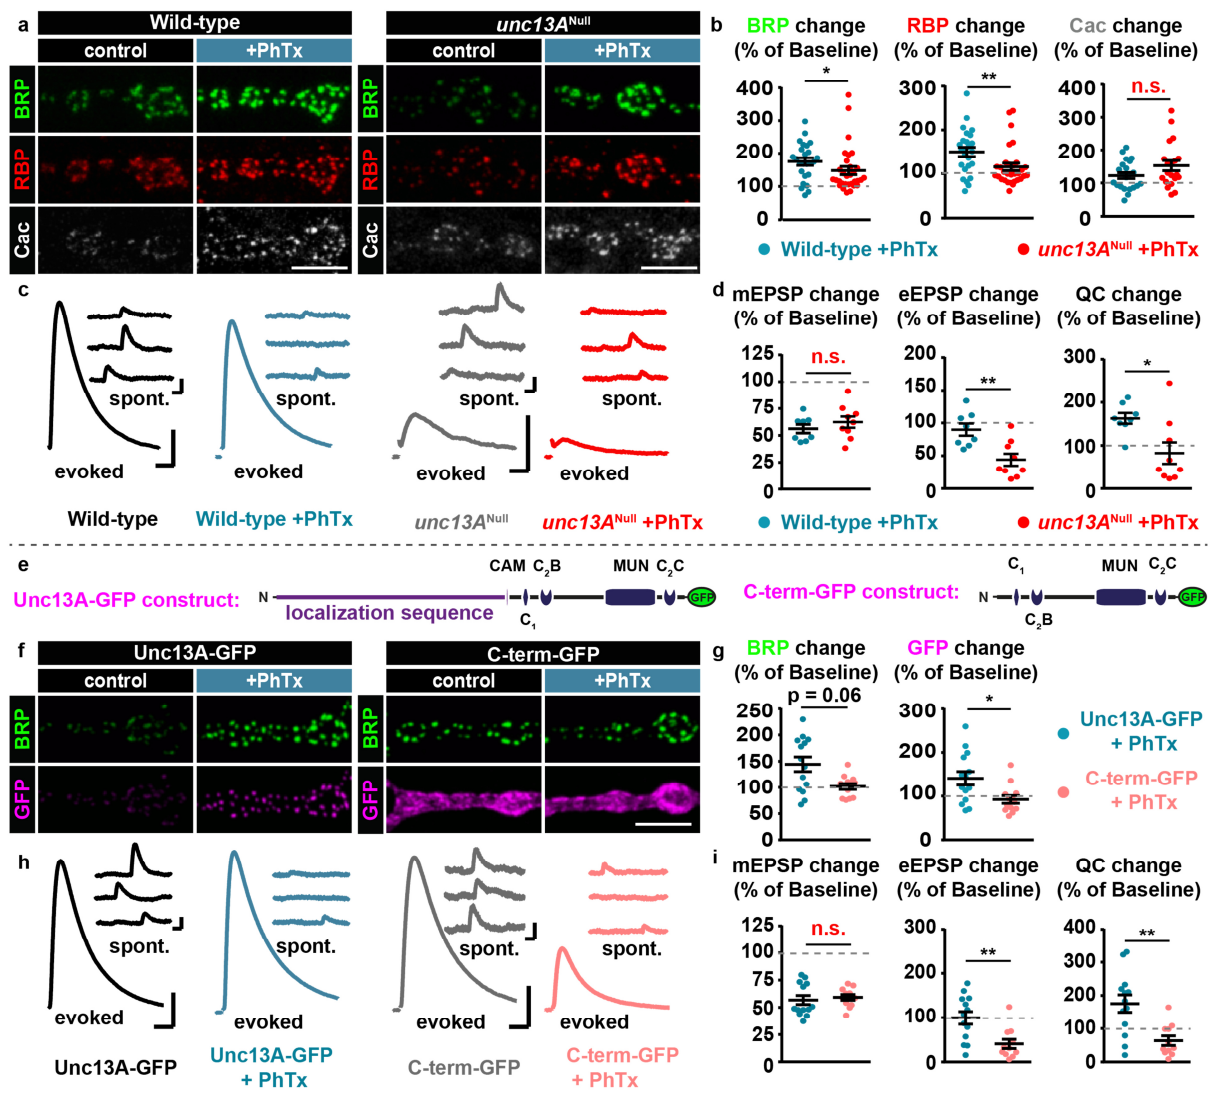

1141

1142 **Figure 6: Unc13A and its N-terminus are critical for rapid PHP and AZ-remodeling.**

1143 **(a)** Confocal images of muscle 4 NMJs of abdominal segment 2-5 from 3rd instar larvae at Wild-  
 1144 type (left) and *unc13A<sup>Null</sup>* (right) NMJs labelled with the indicated antibodies without (control;  
 1145 black) and with 10 minutes PhTx (+PhTx; blue) treatment. **(b)** Quantification of percentage  
 1146 change of synaptic BRP, RBP and Cac AZ-levels in Wild-type (blue) and *unc13A<sup>Null</sup>* (red) upon  
 1147 PhTx-treatment compared to the same measurement in the absence of PhTx for each genotype  
 1148 (dashed grey line indicates 100%/no change). **(c)** Representative traces of eEPSP (evoked) and

1149 mEPSP (spont.) in Wild-type and *unc13A*<sup>Null</sup> animals without (Ctrl; black or grey) and with 10  
1150 minutes PhTx (+PhTx; blue or light red) treatment. **(d)** Quantifications of percentage change of  
1151 mEPSP amplitude, eEPSP amplitude and quantal content (QC) in PhTx-treated Wild-type (blue)  
1152 and *unc13A*<sup>Null</sup> (light red) cells compared to the same measurement obtained without PhTx for  
1153 each genotype. Traces for (c) were replotted from Fig. 1. **(e)** Left: Full length Unc13A construct  
1154 used in rescue experiments of *unc13*<sup>Null</sup> animals. Functional domains for AZ localization,  
1155 Calmodulin- (CAM), lipid-binding (C1, C2B, C2C) and the MUN domain relevant for SV  
1156 release are shown. Right: Schematic of Unc13A construct lacking the N-terminal localization  
1157 sequence (C-term-GFP rescue). **(f-i)** Same as in (a-d) for cells re-expressing Unc13A-GFP (blue)  
1158 or C-term-GFP (light red) in the *unc13*<sup>Null</sup> background. See also Supplementary Figure 8. See  
1159 also Supplementary Figure 10 and 11 for non-normalized values. Exact normalized and raw  
1160 values, detailed statistics including sample sizes and P values are listed in Supplementary Table  
1161 1. Scale bars: (a,f) 5  $\mu$ m; (c,h) eEPSP: 25 ms, 5 mV; mEPSP: 50 ms, 1 mV. Statistics: Student's  
1162 unpaired T-test was used for comparisons in (d), (i) mEPSP change and Mann-Whitney U test  
1163 for all other comparisons. \*P  $\leq$  0.05; \*\*P  $\leq$  0.01; \*\*\*P  $\leq$  0.001; n.s., not significant, P > 0.05. All  
1164 panels show mean  $\pm$  s.e.m..

1165 **Figure 7**

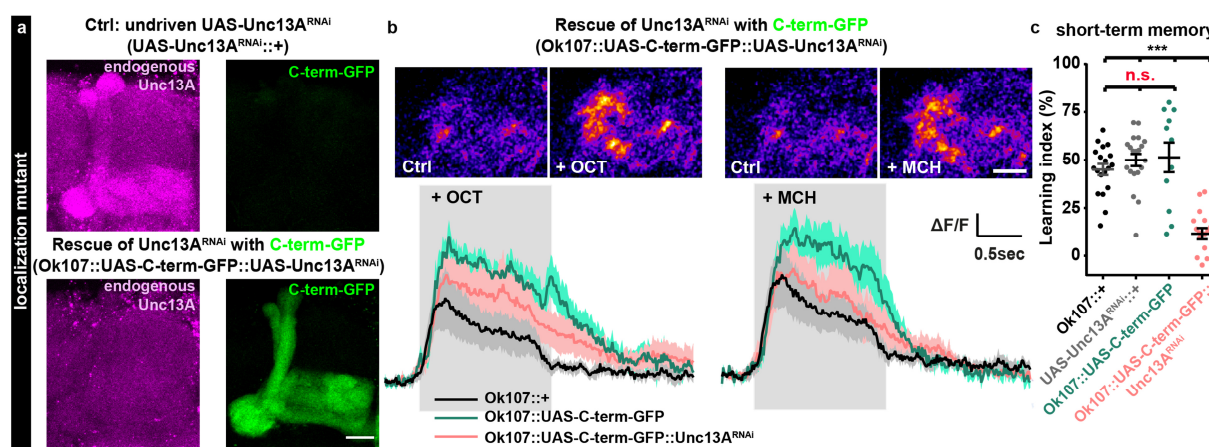

1166

1167 **Figure 7: Mutants incapable of PHP at the NMJ impair short-term memory when**

1168 **expressed in the olfactory learning center of the fly brain.**

1169 **(a)** Confocal images of adult *Drosophila* mushroom-body regions of control (top; undriven  
 1170 UAS-Unc13A<sup>RNAi</sup> (UAS-Unc13A<sup>RNAi</sup>::+)) and rescue of driven UAS-Unc13A<sup>RNAi</sup> with C-term-  
 1171 GFP (bottom; Ok107::UAS-C-term-GFP::UAS-Unc13A<sup>RNAi</sup>) brains labelled with the indicated  
 1172 antibodies. **(b)** Averaged odor responses measured at the level of presynaptic boutons of M4/6  
 1173 (MBON-β'2mp/MBON-γ5β'2a/MBON-β2β'2a) mushroom body output neurons (compare<sup>57</sup> or<sup>96</sup>).  
 1174 Above: sample images of two-photon recordings from M4/6 cells (20 frames averaged  
 1175 respectively) before and after odor onset. Grey shading indicates the time at which the odor was  
 1176 applied. Left panels OCT and right MCH response. Below: averaged odor responses. 5 responses  
 1177 per odor were averaged per animal. Solid lines show mean responses (n = 5 to 6 animals per  
 1178 genotype). Shaded areas represent the SEM. **(c)** Short-term memory scores after mushroom  
 1179 body-specific C-term-GFP rescue after Unc13A downregulation via locally driven RNAi  
 1180 expression (Ok107::UAS-C-term-GFP::UAS-Unc13A<sup>RNAi</sup>) compared to controls expressing the driver,  
 1181 but not the RNAi (Ok107::+), the RNAi without driver (UAS-Unc13A<sup>RNAi</sup>::+) or mushroom  
 1182 body specific overexpression of the C-term-GFP construct (Ok107::UAS-C-term-GFP). See also



1183 Supplementary Fig. 9. Exact values, detailed statistics including sample sizes and P values are  
1184 listed in Table S1. Scale bars: (a) 20  $\mu\text{m}$ ; (b) 10  $\mu\text{m}$ . Statistics: nonparametric one-way analysis  
1185 of variance (ANOVA) test, followed by a Tukey's multiple comparison test. \*\*\* $P \leq 0.001$ ; n.s.,  
1186 not significant,  $P > 0.05$ . All panels show mean  $\pm$  s.e.m.. For representative images experiments  
1187 were repeated twice with at least 6-7 brains per genotype.

1188 **Figure 8**

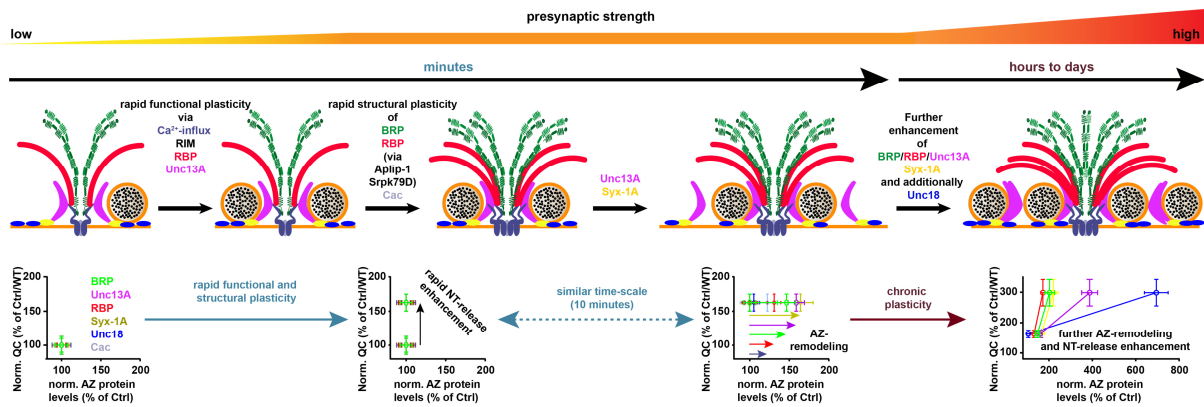

1189

1190 **Figure 8: Sequence of events enabling rapid and sustained homeostatic plasticity**

1191 Top row: Illustration of AZ modes addressed. Bottom row: Plot of normalized quantal content  
 1192 (QC) vs. AZ protein levels of experiments performed in Fig. 1 normalized to either Ctrl (-PhTx)  
 1193 for rapid plasticity or Wild-type for chronic plasticity. In the basal activity mode (left), BRP  
 1194 (green), RBP (red), Syx-1A (yellow), Unc18 (blue) and Unc13A (magenta) provide two SV  
 1195 release sites at the Ca<sup>2+</sup>-channel (Cac; light blue). However just one release site is active  
 1196 (occupied by SV). (Second left) During the rapid functional plasticity phase the quantal content  
 1197 (and thus neurotransmitter (NT) release) is rapidly enhanced within minutes via mechanisms  
 1198 involving altered Ca<sup>2+</sup>-influx as well as RIM, RBP and Unc13A. On a comparable time-scale  
 1199 (minutes), BRP and RBP are incorporated in a pre-existing AZ in an Aplip-1/Srpk79D  
 1200 manner and additionally Cac-levels also increase (third cartoon). The BRP/RBP incorporation  
 1201 enhances AZ levels of Unc13A/Syx-1A providing an additional release sites (fourth left). This  
 1202 rapid structural AZ-remodeling is not required for the rapid functional plasticity but directly acts  
 1203 on the consolidation of the release enhancement. (Right) On longer time-scales, chronic  
 1204 plasticity then further enhances the AZ-levels of BRP, RBP, Syx-1A in a conserved

1205 stoichiometry while Unc13A and Unc18 increase out of scale increasing the number of release  
1206 sites and thus transmitter release/quantal content activity even further.
